# Supplementary material for: Genome mining of cryptic tetronate natural products from a PKS-NRPS encoding gene cluster in Trichoderma harzianum t-22
Source: Royal Society of Chemistry journal article supplement (doi:10.1039/d0ob02545c), 2021-01-01
Supplement: d0ob02545c1.pdf [file d0ob02545c1.pdf]

**Genome mining of cryptic tetronate natural products from a PKS-NRPS  
encoding gene cluster in *Trichoderma harzianum* t-22**

Yiguang Zhu,<sup>‡</sup><sup>a,b</sup> Junfeng Wang,<sup>‡</sup><sup>a,b</sup> Pengyun Mou,<sup>b</sup> Yan Yan,<sup>a,b</sup> Mengbin Chen,<sup>a</sup> Yi Tang<sup>\*a</sup>

<sup>a</sup>Department of Chemical and Biomolecular Engineering, University of California Los Angeles, CA 90095, USA. E-mail: yitang@ucla.edu

<sup>b</sup>Key Laboratory of Tropical Marine Bio-resources and Ecology, Guangdong Key Laboratory of Marine Materia Medica, South China Sea Institute of Oceanology, Chinese Academy of Sciences, Guangzhou 510301, China.

<sup>‡</sup>These authors contribute equally to this work.

## Table of Contents

|                                                                                                                                         |    |
|-----------------------------------------------------------------------------------------------------------------------------------------|----|
| Supplemental Materials and Methods .....                                                                                                | 3  |
| General DNA manipulation techniques .....                                                                                               | 3  |
| Sequence analysis .....                                                                                                                 | 3  |
| <i>A. nidulans</i> protoplast preparation and transformation .....                                                                      | 3  |
| Table S1. Deduced functions of individual <i>orfs</i> in the <i>thn</i> gene cluster.....                                               | 5  |
| Table S2. <sup>1</sup> H and <sup>13</sup> C NMR Data for <b>1-3</b> (500, 125 MHz, CD <sub>3</sub> OD, TMS, δ ppm).....                | 6  |
| Table S3. <sup>1</sup> H and <sup>13</sup> C NMR Data for <b>4-6</b> (500, 125 MHz, TMS, δ ppm).....                                    | 7  |
| Table S4. Strains and plasmids used and generated in this study .....                                                                   | 8  |
| Table S5. Primers used in this study .....                                                                                              | 10 |
| Figure S1. Selected PKS-NRPS gene clusters in <i>T. harzianum</i> t-22.....                                                             | 12 |
| Figure S2. <i>thn</i> cluster is highly conserved in several <i>Trichoderma</i> spp.....                                                | 13 |
| Figure S3. Amino acid alignment of ThnA-A with A domains of reported PKS-NRPS<br>genes .....                                            | 14 |
| Figure S4. HPLC analysis of extracts from <i>A. nidulans</i> transformant containing different<br>combinations of <i>thn</i> genes..... | 15 |
| Figure S5. The spectroscopic data of <b>1</b> .....                                                                                     | 16 |
| Figure S6. The spectroscopic data of <b>2</b> .....                                                                                     | 23 |
| Figure S7. The spectroscopic data of <b>3</b> .....                                                                                     | 30 |
| Figure S8. The spectroscopic data of <b>4</b> .....                                                                                     | 36 |
| Figure S9. The spectroscopic data of <b>5</b> .....                                                                                     | 42 |
| Figure S10. The spectroscopic data of <b>6</b> .....                                                                                    | 48 |
| Figure S11. Bioinformatic analysis of ThnC amino acid sequences. ....                                                                   | 54 |
| Figure S12. SDS-PAGE analysis of purified ThnC.....                                                                                     | 55 |
| Figure S13. HPLC analysis of in vitro assays of ThnC with substrate <b>1</b> .....                                                      | 56 |
| References.....                                                                                                                         | 57 |

## Supplemental Materials and Methods

### General DNA manipulation techniques

All DNA manipulations in this study were conducted according to manufacturers' protocols. DNA restriction enzymes were used as recommended by the manufacturer (New England Biolabs, NEB). PCR was performed according to recommended protocol using Q5 High-Fidelity DNA polymerase (NEB). Genomic DNA extraction was carried out following the instructions of Zymo Quick-DNA Fungal/Bacterial Miniprep Kit. Plasmids were confirmed by restriction enzyme digestion analysis and sequencing.

The RNA extractions were performed using RiboPure™ Yeast RNA Isolation Kit (Ambion) following the manufacturer's instructions. Residual genomic DNA in the extracts was digested by DNase I (2 U/μL) (Invitrogen) at 37°C for 4 hours. SuperScript III First-Strand Synthesis System (Invitrogen) was used for cDNA synthesis with Oligo-dT primers following instructions from the user manual.

### Sequence analysis

The *orfs* were determined using the 2ndfind program(<http://biosyn.nih.go.jp/2ndfind/>). Protein sequences were compared with BLAST programs (<http://blast.ncbi.nlm.nih.gov/Blast.cgi>).

### A. *nidulans* protoplast preparation and transformation

*A. nidulans* A1145 ΔSTΔEM was grown on CD agar plates containing supplements (10 mM uridine, 5mM uracil, 0.5 μg/mL pyridoxine HCl and 2.5 μg/mL riboflavin) at 30°C for 5 days. Fresh spores were inoculated into 50 mL liquid CD media containing supplements in 250 mL flask and germinated at 30°C, 250 rpm for approximately 16 h. Mycelia were harvested by centrifugation at 3,500 rpm for 10 min, and washed with 10 mL osmotic buffer (1.2 M MgSO<sub>4</sub>, 10 mM sodium phosphate, pH 5.8). Then the mycelia were transferred into 30 mL of osmotic buffer containing 100 mg lysing enzymes from *Trichoderma* and 60 mg Yatalase in a 250 mL flask and were shaken at 80 rpm for 4 h at 30°C. Cells were collected

in a 30 mL Corex tube and overlaid gently with 10 mL of trapping buffer (0.6 M sorbitol, 0.1 M Tris-HCl, pH 7.0). After centrifugation at 3,500 rpm for 15 min at 4°C, protoplasts were collected from the interface of the two buffers. The protoplasts were then transferred to a sterile 15 mL falcon tube and washed by 10 mL STC buffer (1.2 M sorbitol, 10 mM CaCl<sub>2</sub>, 10 mM Tris-HCl, pH 7.5). The protoplasts were then resuspended in 1 mL STC buffer and 60 µL aliquots of the protoplasts were stored in -80°C for transformation.

The plasmids extracted from *E. coli* were added to 60 µL *A. nidulans* A1145 protoplast suspension and the mixture was incubated on ice for 60 min. After that, 600 µL of PEG solution (60% PEG, 50 mM CaCl<sub>2</sub> and 50 mM Tris-HCl, pH 7.5) was added to the protoplast mixture, followed by additional incubation at room temperature for 20 min. The mixture was spread on the regeneration medium (CD solid medium with 1.2 M sorbitol and appropriate supplements including 10 mM uridine, 5 mM uracil and/or 0.5 µg/mL pyridoxine HCl and/or 2.5 µg/mL riboflavin depending on the plasmids being transformed) and incubated at 30°C for 2-3 days until single colony appear.

**Table S1.** Deduced functions of individual *orfs* in the *thn* gene cluster

| Gene name   | Size (aa) | Proposed protein function            | Homolog (identity) | Homolog Organism                         |
|-------------|-----------|--------------------------------------|--------------------|------------------------------------------|
| <i>thaA</i> | 4044      | PKS-NRPS synthetase                  | CcsA (40%)         | <i>Aspergillus clavatus</i> NRRL 1       |
| <i>thaB</i> | 563       | Transporter                          | GsfJ (49%)         | <i>Penicillium aethiopicum</i>           |
| <i>thaC</i> | 321       | 2-oxoglutarate-dependent dioxygenase | TropC (38%)        | <i>Talaromyces stipitatus</i> ATCC 10500 |
| <i>thaD</i> | 406       | FAD-dependent monooxygenase          | CctM (27%)         | <i>Trichophyton benhamiae</i> CBS 112371 |
| <i>thaE</i> | 369       | Trans-enoyl reductase                | FSL5 (44%)         | <i>Fusarium graminearum</i> PH-1         |

**Table S2.** <sup>1</sup>H and <sup>13</sup>C NMR Data for **1-3** (500, 125 MHz, CD<sub>3</sub>OD, TMS, δ ppm).

| c   | 1                     |                                               | 2                     |                                               | 3                     |                                               |
|-----|-----------------------|-----------------------------------------------|-----------------------|-----------------------------------------------|-----------------------|-----------------------------------------------|
|     | $\bar{\delta}_C$      | $\bar{\delta}_H$ (J in Hz)                    | $\bar{\delta}_C$      | $\bar{\delta}_H$ (J in Hz)                    | $\bar{\delta}_C$      | $\bar{\delta}_H$ (J in Hz)                    |
| 1   | n.d. <sup>a</sup>     |                                               | n.d. <sup>a</sup>     |                                               | n.d. <sup>a</sup>     |                                               |
| 2   | 98.9 <sup>b</sup> , C |                                               | 99.1 <sup>b</sup> , C |                                               | 95.9 <sup>b</sup> , C |                                               |
| 3   | 193.6, C              |                                               | 193.5, C              |                                               | 196.1, C              |                                               |
| 4   | 78.2, CH              | 4.97, m                                       | 78.1, CH              | 5.00, m                                       | 78.3, CH              | 4.67, m                                       |
| 5   | 36.9, CH <sub>2</sub> | 2.99, dd (17.0, 3.7);<br>2.74, dd (17.0, 7.1) | 36.7, CH <sub>2</sub> | 3.00, dd (17.1, 3.5);<br>2.77, dd (17.1, 6.8) | 38.5, CH <sub>2</sub> | 2.90, dd (16.5, 3.3);<br>2.46, dd (16.5, 9.0) |
| 6   | 172.7, C              |                                               | 172.6, C              |                                               | 174.5, C              |                                               |
| 1'  | 191.6, C              |                                               | 191.1, C              |                                               | 196.0, C              |                                               |
| 2'  | 134.1, C              |                                               | 133.7, C              |                                               | 137.0, C              |                                               |
| 3'  | 147.3, CH             | 6.84, t (6.8)                                 | 148.0, CH             | 6.91, t (6.8)                                 | 138.6, CH             | 6.12, t (6.6)                                 |
| 4'  | 30.2, CH <sub>2</sub> | 2.39, m                                       | 30.2, CH <sub>2</sub> | 2.40, m                                       | 29.5, CH <sub>2</sub> | 2.24, m; 2.21, m                              |
| 5'  | 32.3, CH <sub>2</sub> | 2.26, m                                       | 32.3, CH <sub>2</sub> | 2.30, m; 2.25, m                              | 32.6, CH <sub>2</sub> | 2.20, m; 2.03, m                              |
| 6'  | 131.6, CH             | 5.62, m                                       | 131.9, CH             | 5.64, m                                       | 133.3, CH             | 5.65, m                                       |
| 7'  | 132.9, CH             | 6.06, dd (14.9, 10.3)                         | 132.8, CH             | 6.04, m                                       | 132.1, CH             | 6.01, m                                       |
| 8'  | 130.1, CH             | 5.97, dd (14.9, 10.3)                         | 130.3, CH             | 6.00, m                                       | 130.5, CH             | 6.04, m                                       |
| 9'  | 139.5, CH             | 5.44, dd (15.0, 7.9)                          | 139.1, CH             | 5.45, dd (14.8, 8.1)                          | 137.0, CH             | 5.51, m                                       |
| 10' | 39.8, CH              | 2.03, m                                       | 34.6, CH              | 2.27, m                                       | 34.8, CH              | 2.64, m                                       |
| 11' | 30.9, CH <sub>2</sub> | 1.32, m                                       | 40.7, CH <sub>2</sub> | 1.52, m                                       | 42.7, CH <sub>2</sub> | 2.26, m                                       |
| 12' | 12.2, CH <sub>3</sub> | 0.86, t (7.4)                                 | 61.1, CH <sub>2</sub> | 3.54, m                                       | 176.5, C              |                                               |
| 13' | 12.2, CH <sub>3</sub> | 1.88, s                                       | 12.1, CH <sub>3</sub> | 1.89, s                                       | 12.9, CH <sub>3</sub> | 1.80, s                                       |
| 14' | 20.7, CH <sub>3</sub> | 0.98, d (6.8)                                 | 21.1, CH <sub>3</sub> | 1.01, d (6.8)                                 | 20.5, CH <sub>3</sub> | 1.05, d (6.8)                                 |

<sup>a</sup> Signals not detected from HMBC correlations; <sup>b</sup> Signals acquired from <sup>13</sup>C NMR spectrum.

**Table S3.**  $^1\text{H}$  and  $^{13}\text{C}$  NMR Data for **4-6** (500, 125 MHz, TMS,  $\delta$  ppm).

| No. | <b>4<sup>a</sup></b>  |                               | <b>5<sup>b</sup></b>  |                               | <b>6<sup>c</sup></b>  |                                  |
|-----|-----------------------|-------------------------------|-----------------------|-------------------------------|-----------------------|----------------------------------|
|     | $\delta_{\text{C}}$   | $\delta_{\text{H}}$ (J in Hz) | $\delta_{\text{C}}$   | $\delta_{\text{H}}$ (J in Hz) | $\delta_{\text{C}}$   | $\delta_{\text{H}}$ (J in Hz)    |
| 1   | n.d. <sup>d</sup>     |                               | n.d. <sup>d</sup>     |                               | n.d. <sup>d</sup>     |                                  |
| 2   | 93.6 <sup>e</sup> , C |                               | n.d. <sup>d</sup>     |                               | 96.9 <sup>e</sup> , C |                                  |
| 3   | n.d. <sup>d</sup>     |                               | n.d. <sup>d</sup>     |                               | 182.1, C              |                                  |
| 4   | 154.5, C              |                               | 148.1, C              |                               | 155.6, C              |                                  |
| 5   | 85.3, CH <sub>2</sub> | 4.70, s;<br>4.46, s           | 96.5, CH <sub>2</sub> | 5.44, d (2.5);<br>5.26, s     | 89.0, CH <sub>2</sub> | 5.04, d (1.6);<br>7.71, d, (1.5) |
| 1'  | 191.7, C              |                               | 192.7, C              |                               | 195.7, C              |                                  |
| 2'  | 136.8, C              |                               | 150.2, C              |                               | 138.0, C              |                                  |
| 3'  | 134.7, CH             | 5.90, m                       | 132.8, CH             | overlap                       | 139.3, CH             | 6.15, t (6.0)                    |
| 4'  | 28.0, CH <sub>2</sub> | 2.14, m                       | 29.7, CH <sub>2</sub> | 2.43, m                       | 29.7, CH <sub>2</sub> | 2.28, m                          |
| 5'  | 31.4, CH <sub>2</sub> | 2.14, m; 1.23, m              | 31.2, CH <sub>2</sub> | 2.30, m                       | 32.7, CH <sub>2</sub> | 2.21, m                          |
| 6'  | 131.6, CH             | 5.63, m                       | 130.9, CH             | 5.62, m                       | 133.3, CH             | 5.67, m                          |
| 7'  | 130.7, CH             | 6.02, m                       | 131.5, CH             | 6.04, m                       | 132.1, CH             | 6.03, m                          |
| 8'  | 128.7, CH             | 5.95, m                       | 129.0, CH             | 6.01, m                       | 130.6, CH             | 6.03, m                          |
| 9'  | 138.0, CH             | 5.45, dd (15.1, 7.4)          | 138.5, CH             | 5.49, dd (14.2, 8.1)          | 137.0, CH             | 5.51, m                          |
| 10' | 37.7, CH              | 2.01, m                       | 34.0, CH              | 2.31, m                       | 34.8, CH              | 2.64, m                          |
| 11' | 29.3, CH <sub>2</sub> | 1.23, m                       | 39.9, CH <sub>2</sub> | 1.57, m                       | 42.6, CH <sub>2</sub> | 2.25, m                          |
| 12' | 11.7, CH <sub>3</sub> | 0.80, t (6.3)                 | 61.4, CH <sub>2</sub> | 3.65, m                       | 176.4, C              |                                  |
| 13' | 12.9, CH <sub>3</sub> | 1.69, s                       | 12.2, CH <sub>3</sub> | 1.92, s                       | 12.8, CH <sub>3</sub> | 1.81, s                          |
| 14' | 20.0, CH <sub>3</sub> | 0.94, d (6.5)                 | 20.9, CH <sub>3</sub> | 1.02, d (6.7)                 | 20.5, CH <sub>3</sub> | 1.06, d (6.8)                    |

<sup>a</sup>Measured in DMSO-*d*<sub>6</sub>; <sup>b</sup>Measured in CDCl<sub>3</sub>; <sup>c</sup>Measured in CD<sub>3</sub>OD; <sup>d</sup>Signals not detected from HMBC correlations; <sup>e</sup>Signals acquired from  $^{13}\text{C}$  NMR spectrum.

**Table S4.** Strains and plasmids used and generated in this study

| Strains/Plasmids                                 | Characteristics                                                                           | Sources    |
|--------------------------------------------------|-------------------------------------------------------------------------------------------|------------|
| <i>E. coli</i>                                   |                                                                                           |            |
| TOP10                                            | Host strain for cloning                                                                   | Invitrogen |
| BL21(DE3)                                        | Host strain for protein expression                                                        | Novagen    |
| Fungi                                            |                                                                                           |            |
| <i>S. cerevisiae</i> BJ5464-NpgA                 | Host for <i>in vivo</i> homologous recombination to construct <i>A. nidulans</i> plasmids | 1          |
| <i>T. harzianum</i> t-22                         | Wild type                                                                                 | 2          |
| <i>A. nidulans</i> A1145 $\Delta$ ST $\Delta$ EM | Host strain for heterologous expression                                                   | 3          |
| ZYG001                                           | <i>A. nidulans</i> A1145 containing plasmid pYTU, pYTP and pYTR                           | This study |
| ZYG002                                           | <i>A. nidulans</i> A1145 containing plasmid pZYG001                                       | This study |
| ZYG003                                           | <i>A. nidulans</i> A1145 containing plasmid pZYG001 and pZYG002                           | This study |
| ZYG004                                           | <i>A. nidulans</i> A1145 containing plasmid pZYG001 and pZYG003                           | This study |
| ZYG005                                           | <i>A. nidulans</i> A1145 containing plasmid pZYG001, pZYG002 and pZYG003                  | This study |
| ZYG006                                           | <i>A. nidulans</i> A1145 containing plasmid pZYG001, pZYG002 and pZYG004                  | This study |
| ZYG007                                           | <i>A. nidulans</i> A1145 containing plasmid pZYG005                                       | This study |
| <b>Plasmids</b>                                  |                                                                                           |            |



|         |                                                            |            |
|---------|------------------------------------------------------------|------------|
| pET28b  | Km <sup>R</sup> , expression vector                        | Novagen    |
| pYTU    | Heterologous expression vector in <i>A. nidulans</i> A1145 | 1          |
| pYTP    | Heterologous expression vector in <i>A. nidulans</i> A1145 | 1          |
| pYTR    | Heterologous expression vector in <i>A. nidulans</i> A1145 | 1          |
| pZYG001 | pYTP containing <i>glaA-thnA</i> and <i>gpdA-thnE</i>      | This study |
| pZYG002 | pYTU containing <i>glaA-thnC</i>                           | This study |
| pZYG003 | pYTR containing <i>gpdA-thnD</i>                           | This study |
| pZYG004 | PYTR containing <i>gpdA-thnD</i> and <i>glaA-thnB</i>      | This study |
| pZYG005 | pYTP containing <i>glaA-thnA</i>                           | This study |
| pZYG105 | pET28b containing 960bp <i>thnC</i> fragment               | This study |

**Table S5.** Primers used in this study

| Primers      | Plasmids | Sequences                                                     |
|--------------|----------|---------------------------------------------------------------|
| TH22-22AE-1  | pZYG001  | CCTCGCGGGTGTTCCTTGACGATGGCATCCTCCTGATCTTCCGAACTGGTCGTACCTGGCG |
| TH22-22AE-2  |          | TGCGATCGGCTCCAGGTTTTGGGATCCCATTGCTGAGGTGTAATGATGCTGGGGATGAAG  |
| TH22-22AE-3  |          | CTTCATCCCCAGCATCATTACACCTCAGCAATGGGATCCCCAAAACCTGGAGCCGATCGCA |
| TH22-22AE-4  |          | GGCCGCATAGTTGGCCTGGCCGAGGTTACCAACAACGCACGCGGCTGACGAGAACAAGAC  |
| TH22-22AE-5  |          | GTCTTGTTCTCGTCAGCCGCGTGC GTTGTGGTAACCTCGGCCAGGCCAACTATGCGGCC  |
| TH22-22AE-6  |          | CTCCCGTCACCCAAATCAATTCACCCGAGTCCGGTCTTGCGACAGTGTGACCAATCACAC  |
| TH22-22AE-7  |          | GTGTGATTGGTCACACTGTCGCAAGACCCGACTCCGGTGAATTGATTTGGGTGACGGGAG  |
| TH22-22AE-8  |          | AACTGCCCCATCGTAGTAGCGGACGACATTGTTTAGATGTGTCTATGTGGCGGGGTAATG  |
| TH22-22AE-9  |          | CATTACCCCGCCACATAGACAATCTAAACAATGTCGTCCGCTACTACGATGGGGCAGTT   |
| TH22-22AE-10 |          | AAGCTTGATATCGAATTCCTGCAGCCCGGGCGTTAAAAGGTGTCCAAGTAGAGCAACGGC  |
| TH22-22C-1   | pZYG002  | CTTCATCCCCAGCATCATTACACCTCAGCAATGTCGGAAGAAGATATCTCGTTGCCATC   |
| TH22-22C-2   |          | AGTGGAGGACATACCCGTAATTTCTGGGCCGCAACTTGCCTGCCTAGGCATGTGATTGG   |
| TH22-22D-1   | pZYG003  | ATTACCCCGCCACATAGACACATCTAAACAATGCACGTTCTTATTGCAGGAGCCGGGCT   |
| TH22-22D-2   |          | TAAAGGGTATCATCGAAAGGGAGTCATCCAGCTATGGGCCTAGGGCAATATTCTACAGTC  |
| TH22-22BD-1  | pZYG004  | ATTACCCCGCCACATAGACACATCTAAACAATGCACGTTCTTATTGCAGGAGCCGGGCT   |
| TH22-22BD-2  |          | CGCCAGGTACGACCAGTTCGGAAGATCAGGGCTATGGGCCTAGGGCAATATTCTACAGTC  |
| TH22-22BD-3  |          | GACTGTAGAATATTGCCCTAGGCCCATAGCCCTGATCTTCCGAACTGGTCGTACCTGGCG  |
| TH22-22BD-4  |          | TCTCGTGGCACTGTAGTCTCCGCTCATTGCTGAGGTGTAATGATGCTGGGGATGAAG     |
| TH22-22BD-5  |          | CTTCATCCCCAGCATCATTACACCTCAGCAATGAGCGGAGACTACAGTGCCACGAGA     |
| TH22-22BD-6  |          | TAAAGGGTATCATCGAAAGGGAGTCATCCAGAAGCAATATCACGTAGCATGCATCTTC    |
| TH22-22A-1   | pZYG005  | CCTCGCGGGTGTTCCTTGACGATGGCATCCTCCTGATCTTCCGAACTGGTCGTACCTGGCG |
| TH22-22A-2   |          | TGCGATCGGCTCCAGGTTTTGGGATCCCATTGCTGAGGTGTAATGATGCTGGGGATGAAG  |

|            |         |                                                               |
|------------|---------|---------------------------------------------------------------|
| TH22-22A-3 |         | CTTCATCCCCAGCATCATTACACCTCAGCAATGGGATCCCAAACCTGGAGCCGATCGCA   |
| TH22-22A-4 |         | GGCCGCATAGTTGGCCTGGCCGAGGTTACCAACAACGCACGCGGCTGACGAGAACAAGAC  |
| TH22-22A-5 |         | GTCTTGTTCTCGTCAGCCGCGTGC GTTGTGGTAACCTCGGCCAGGCCAACTATGCGGCC  |
| TH22-22A-6 |         | GATGAGACCCAACAACCATGATACCAGGGGCCGGTCTTGCGACAGTGTGACCAATCAC    |
| ThnC-EF    | pZYG105 | TTTTGTTTAACTTTAAGAAGGAGATATACCATGTTCGGAAGAAGATATCTCGTTGCCCATC |
| ThnC-ER    |         | GATCTCAGTGGTGGTGGTGGTGGAGCTCTCCAACCTGAGCAAG                   |

**Figure S1.** Selected PKS-NRPS gene clusters in *T. harzianum* t-22

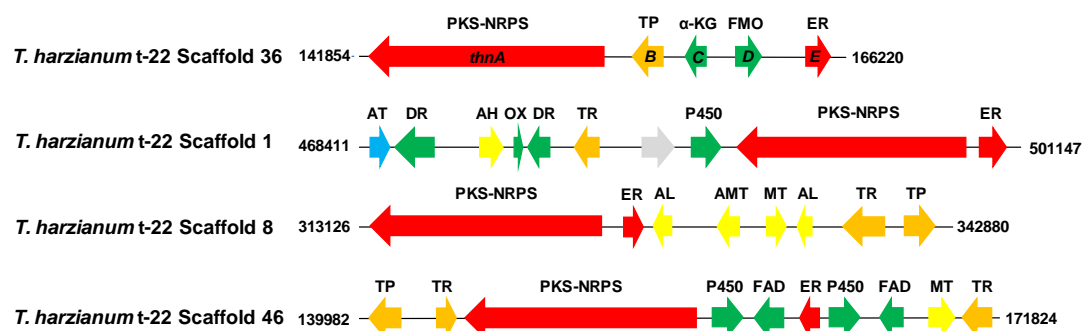

PKS-NRPS: polyketide synthase and nonribosomal peptide synthetase; ER: trans enoyl reductase; TP: transporter; TR: transcriptional regulator;  $\alpha$ -KG:  $\alpha$ -ketoglutarate-dependent dioxygenase; FMO: flavin-dependent monooxygenase; DR: dehydrogenase, OX: oxygenase; AT: acetyltransferase; AH: alpha/beta hydrolase; AL: aldolase; AMT: aminotransferase; MT: methyltransferase.

**Figure S2.** *thn* cluster is highly conserved in several *Trichoderma* spp.

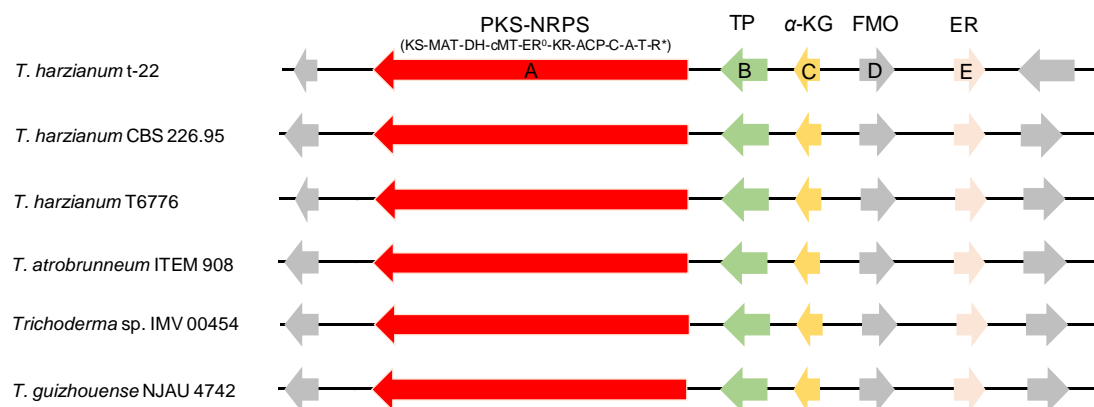

**Figure S3.** Amino acid alignment of ThnA-A with A domains of reported PKS-NRPS genes

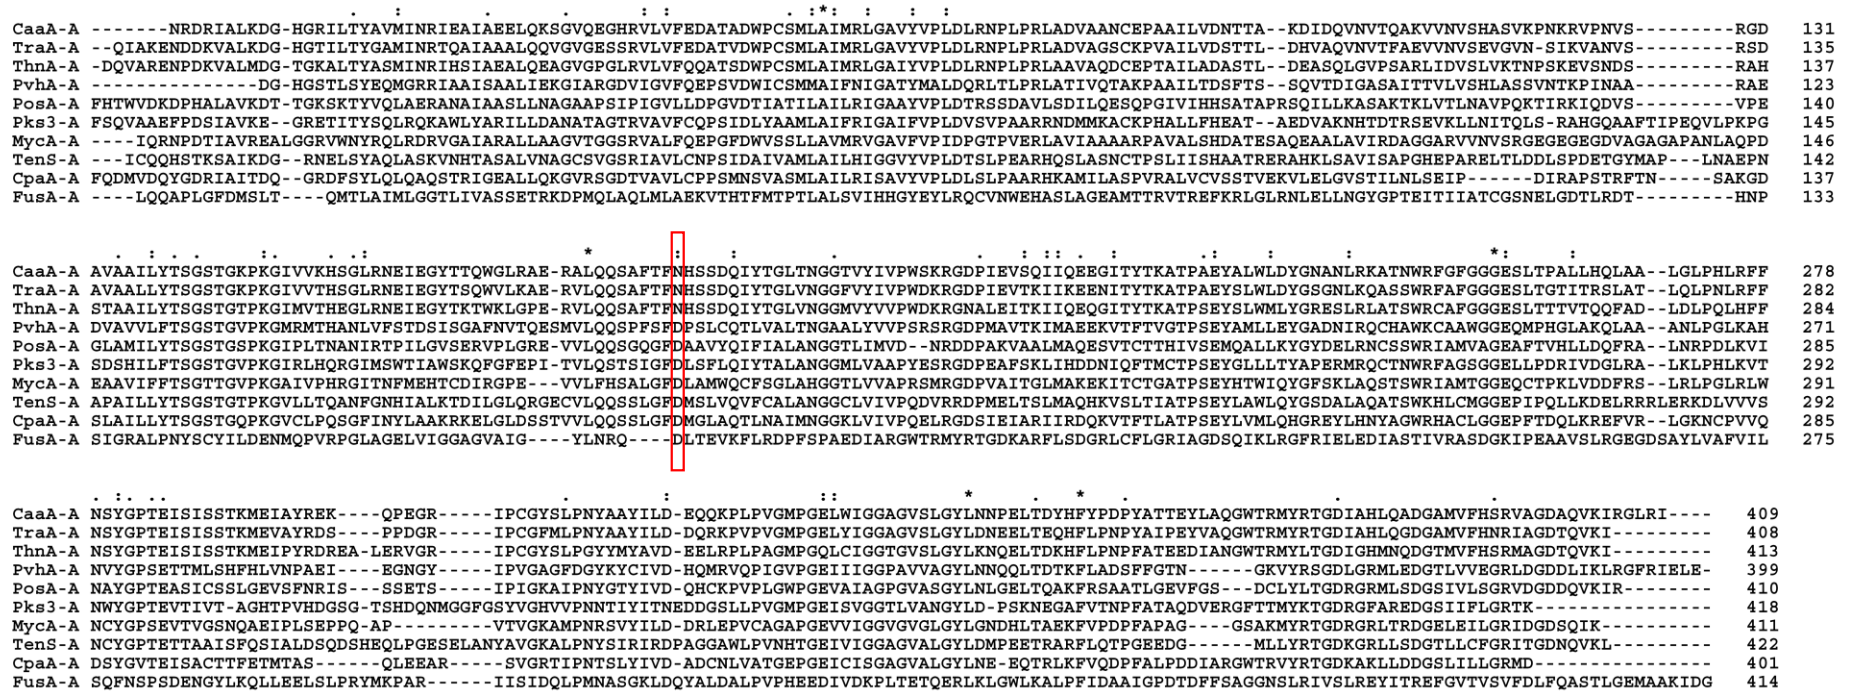

Conserved amino acid residues for A domain recognition active sites were labeled in red box. CaaA (EHA18001), TraA (QBK15049), PvhA (AZZ09613), PsoA (ABS87601), Pks3 (AAS46233), MycA (G2Q9A5), TenS (EJP63694), CpaA (BAG82673), FusA (AFP73394).

**Figure S4.** HPLC analysis of extracts from *A. nidulans* transformant containing different combinations of *thn* genes.

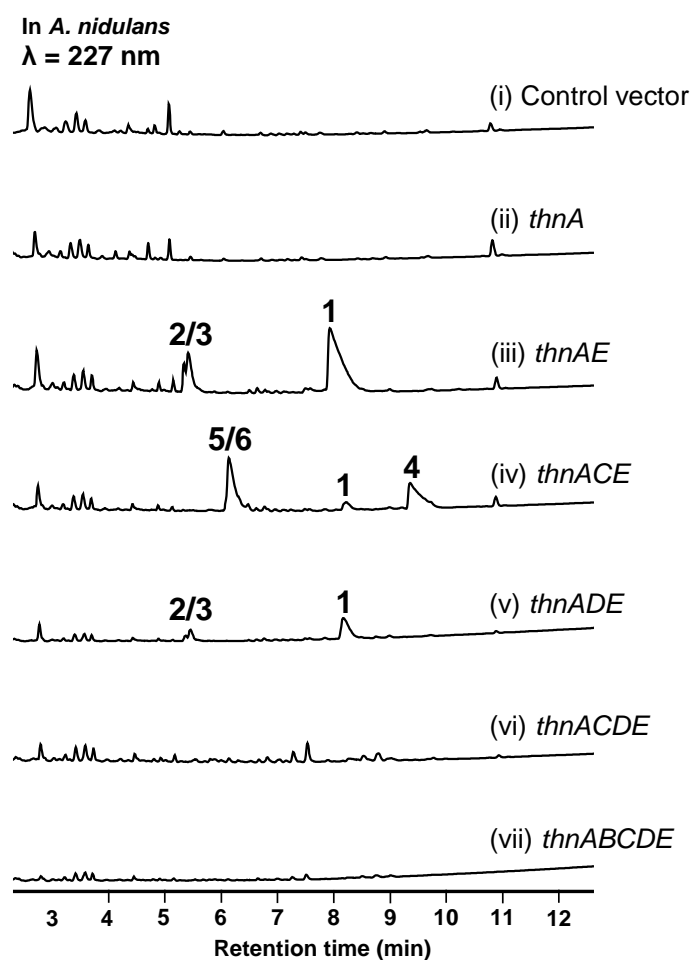

In the presence of the FAD-dependent monooxygenase *thnD* with *thnACE*, no detectable metabolite is produced. Each transformant was cultured on CDST agar at 28°C for 3 days before extraction of metabolites.

**Figure S5.** The spectroscopic data of **1**

(A) The HRESIMS spectrum of **1**

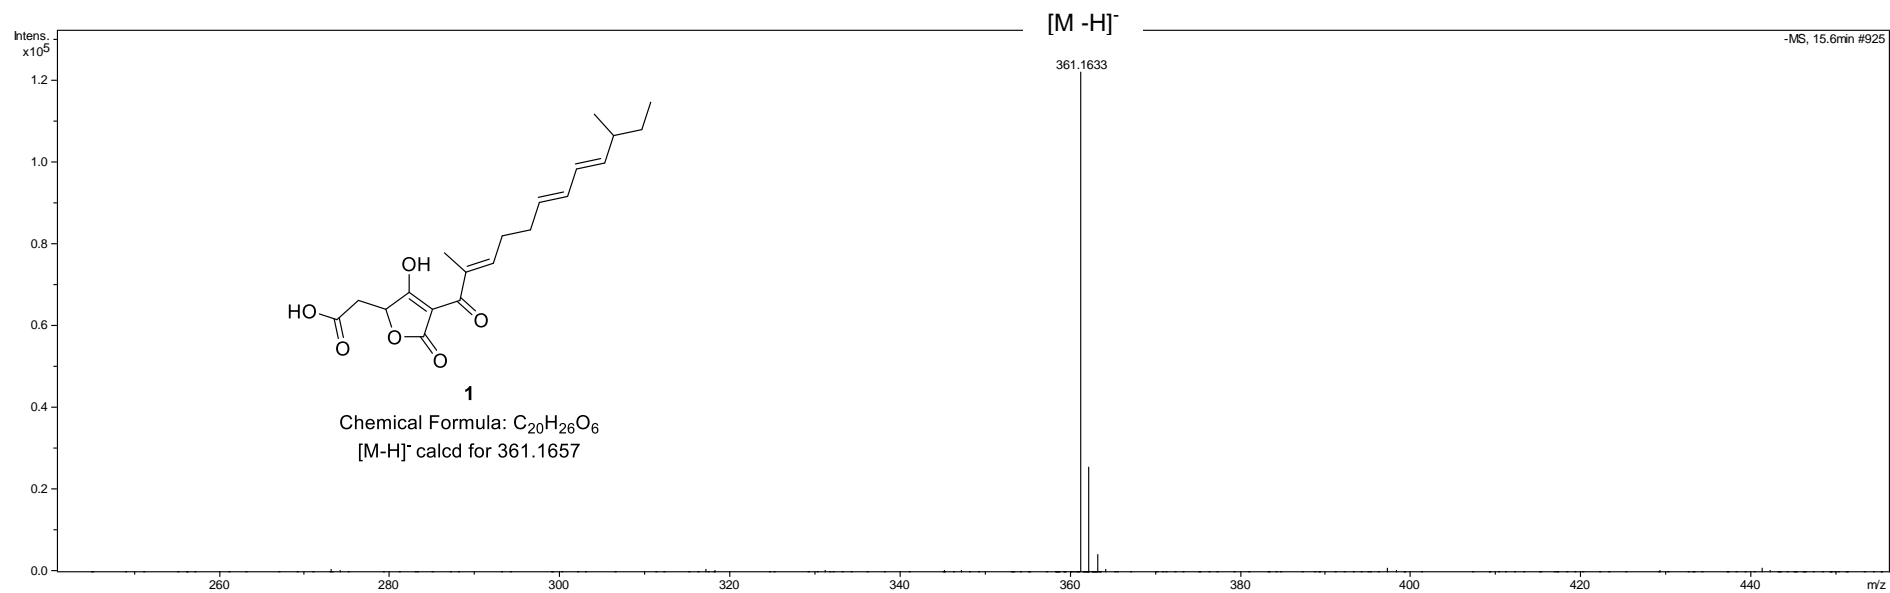



**Figure S5.** The spectroscopic data of **1**  
(B) The  $^1\text{H-NMR}$  spectrum of **1** (500 MHz for  $^1\text{H}$  NMR in  $\text{CD}_3\text{OD}$ )

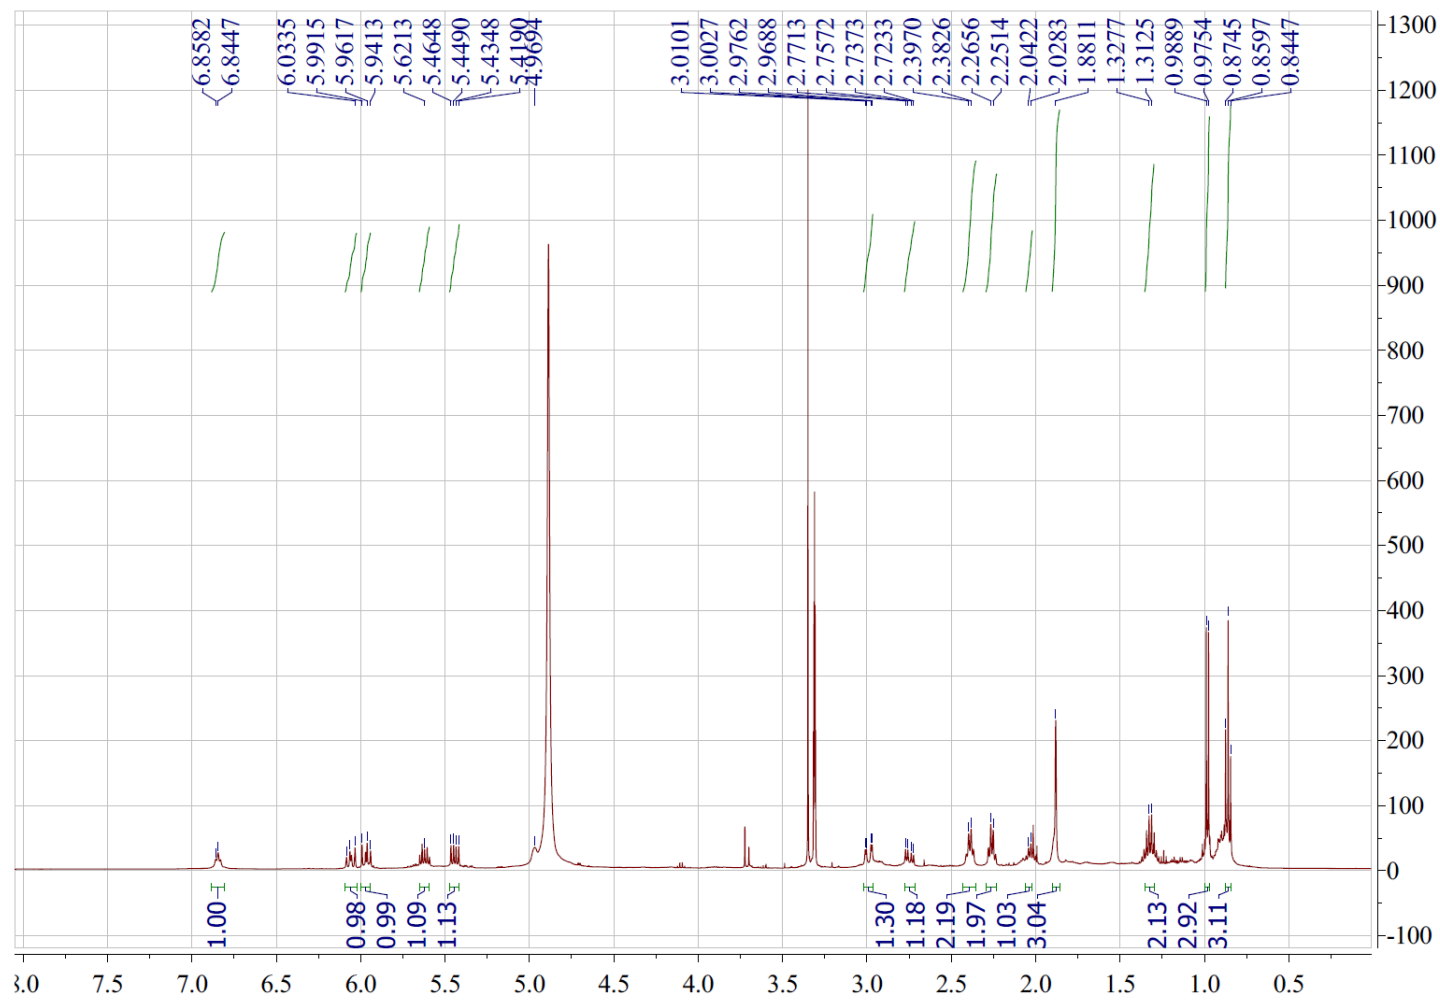

**Figure S5.** The spectroscopic data of **1**  
(C) The  $^{13}\text{C}$  NMR spectrum of compound **1** in  $\text{CD}_3\text{OD}$  (125 MHz)

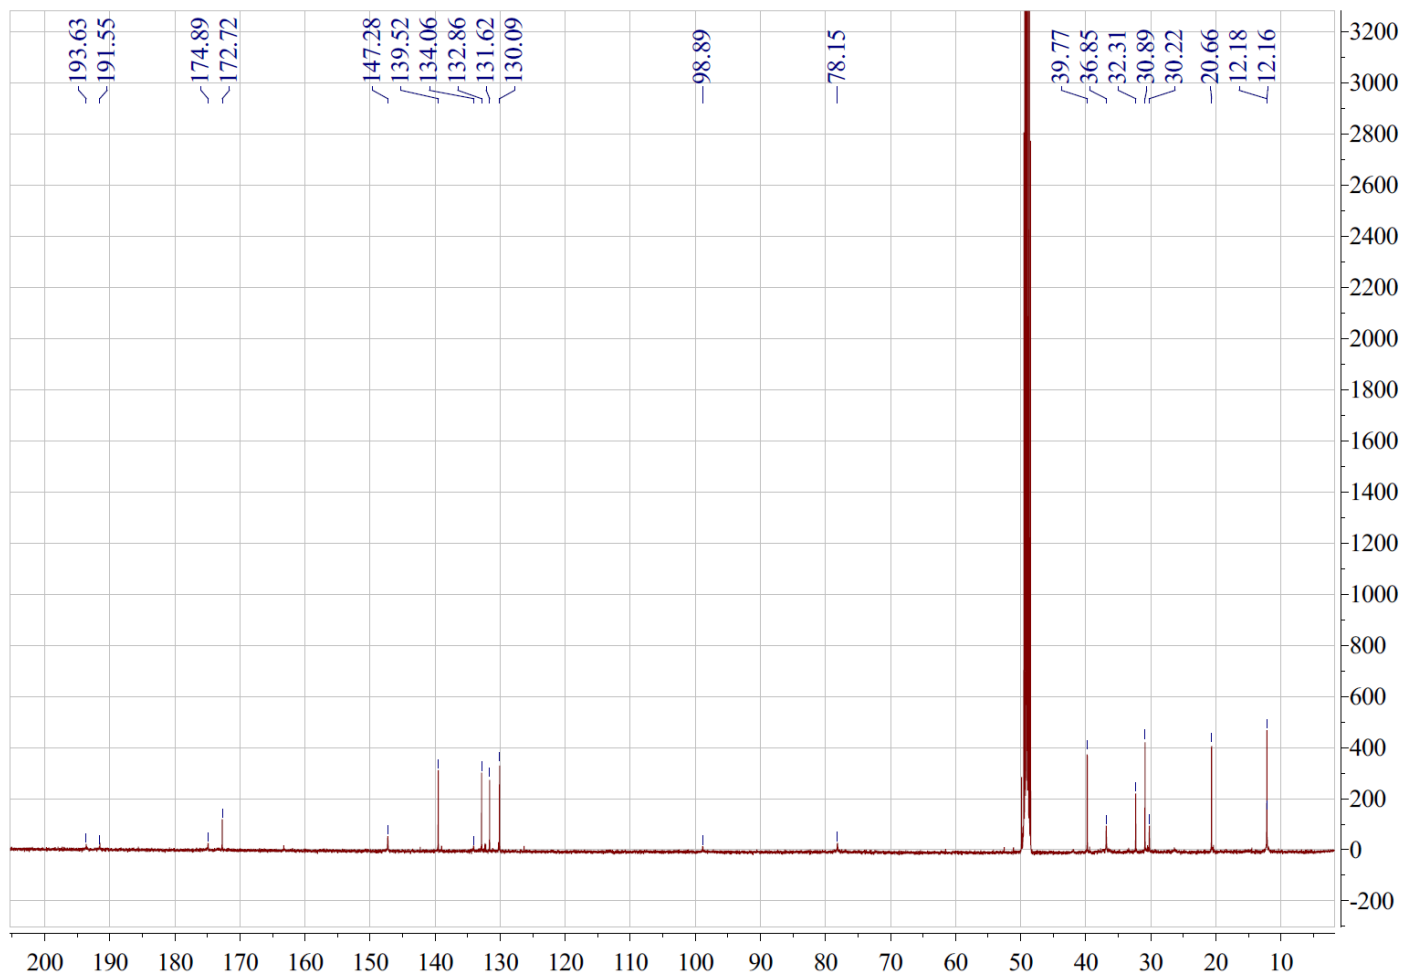

**Figure S5.** The spectroscopic data of **1**  
(D) The HSQC spectrum of compound **1** in CD<sub>3</sub>OD (125 MHz)

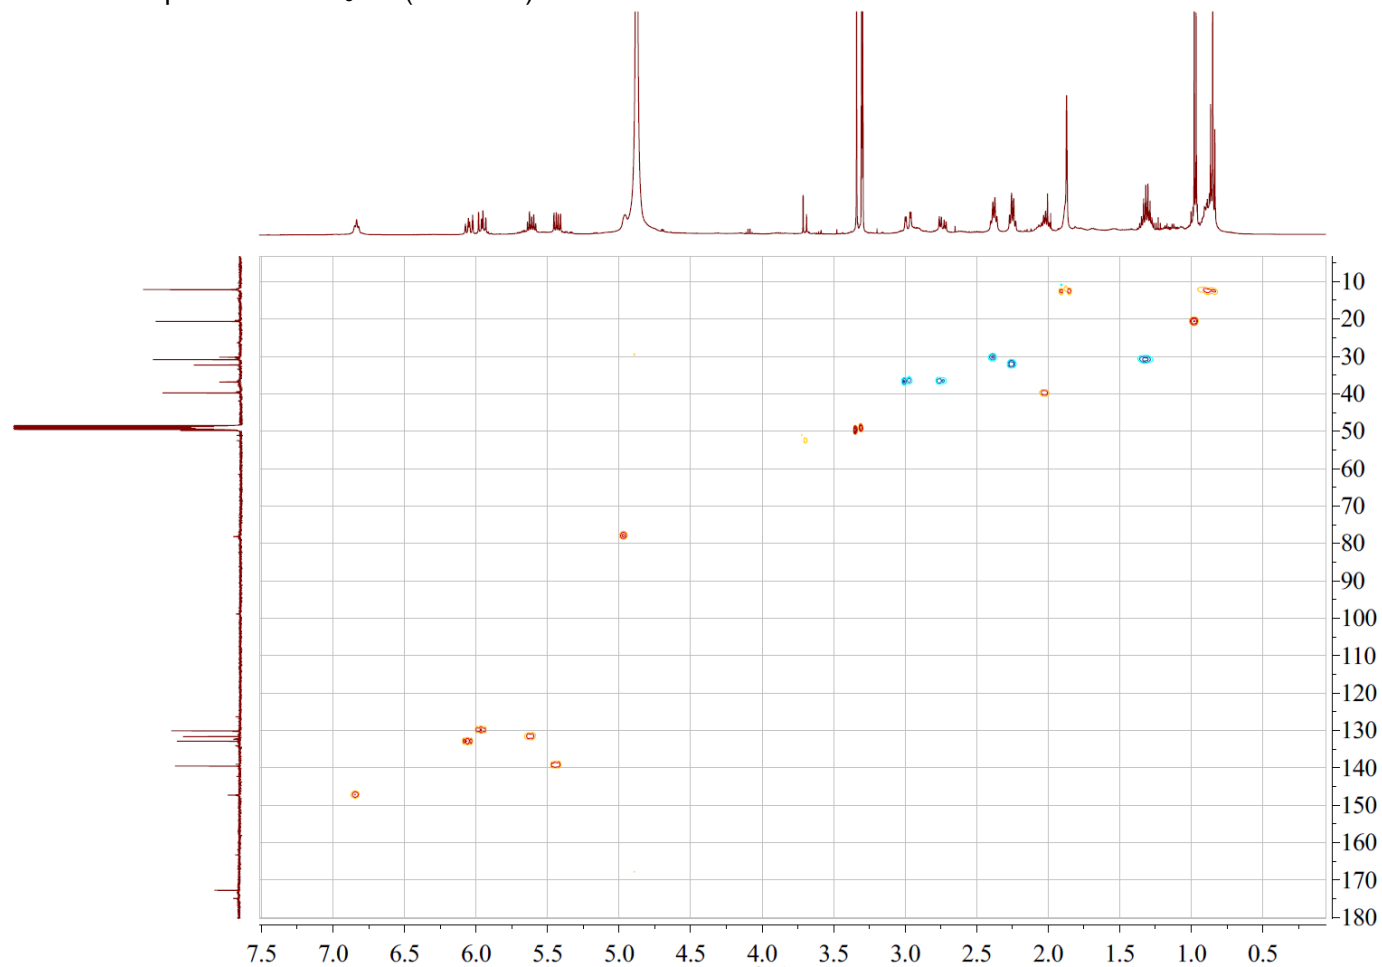

**Figure S5.** The spectroscopic data of **1**  
(E) The HMBC spectrum of **1** (500 MHz for  $^1\text{H}$  NMR in  $\text{CD}_3\text{OD}$ )

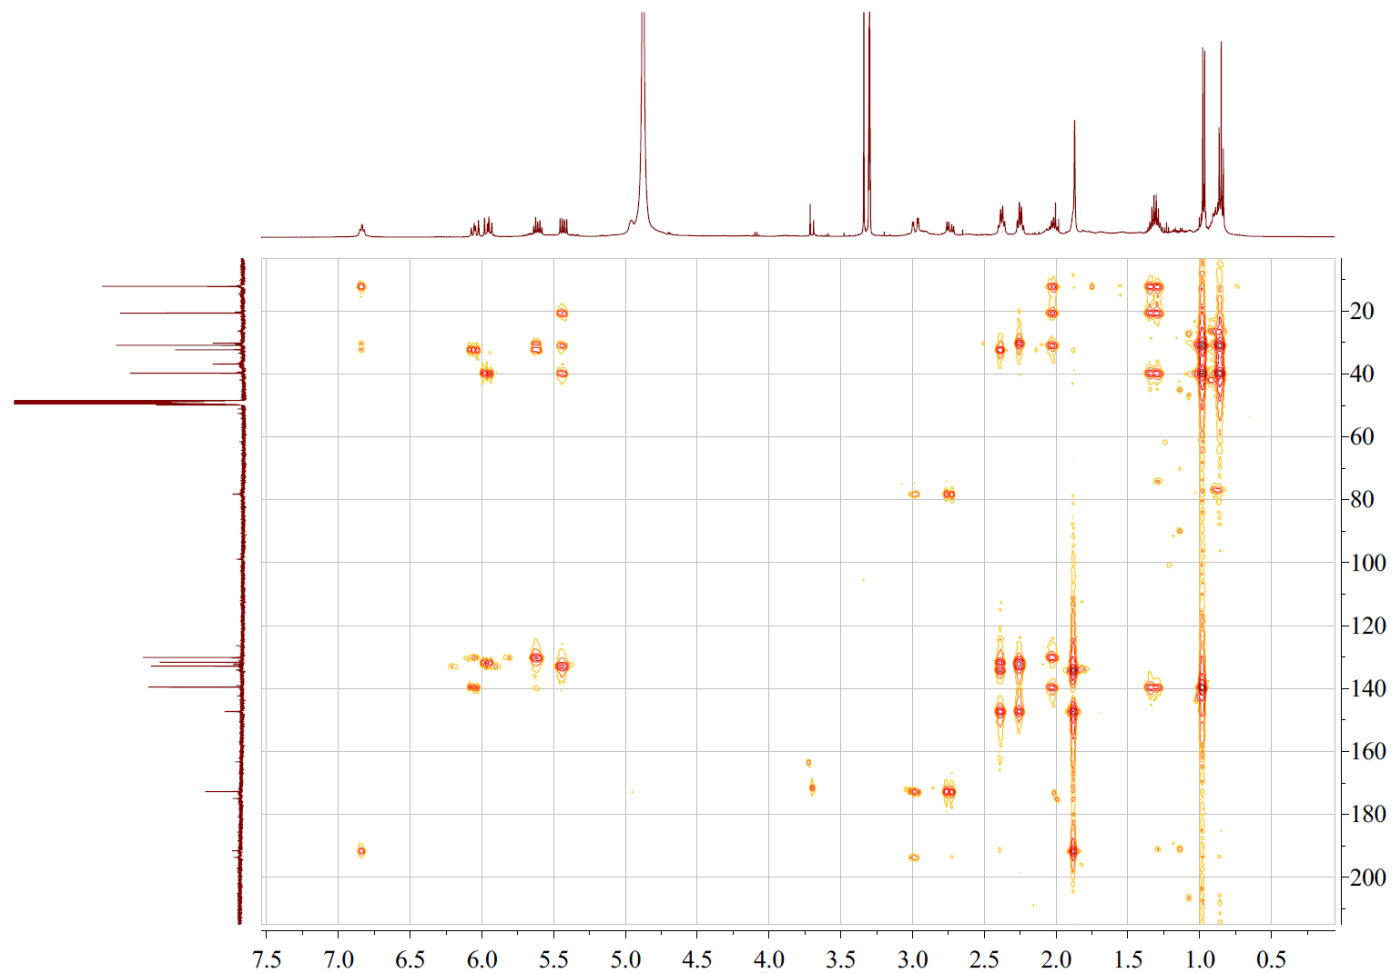

**Figure S5.** The spectroscopic data of **1**  
(F) The  $^1\text{H}$ - $^1\text{H}$  COSY spectrum of **1** (500 MHz for  $^1\text{H}$  NMR in  $\text{CD}_3\text{OD}$ )

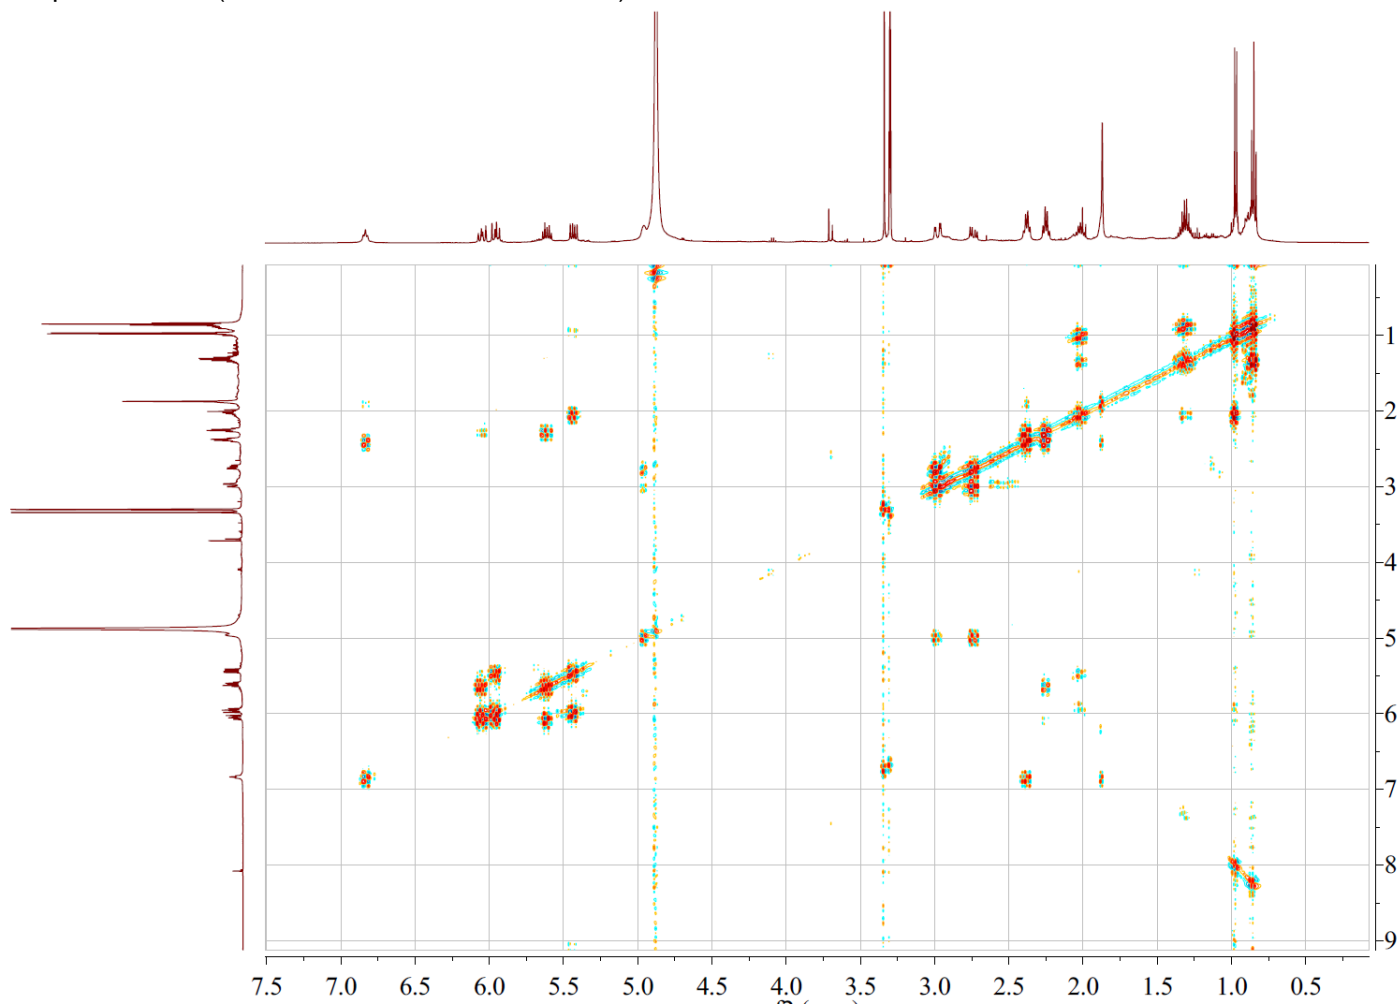

**Figure S5.** The spectroscopic data of **1**  
(G) The NOESY spectrum of **1** (500 MHz for  $^1\text{H}$  NMR in  $\text{CD}_3\text{OD}$ )

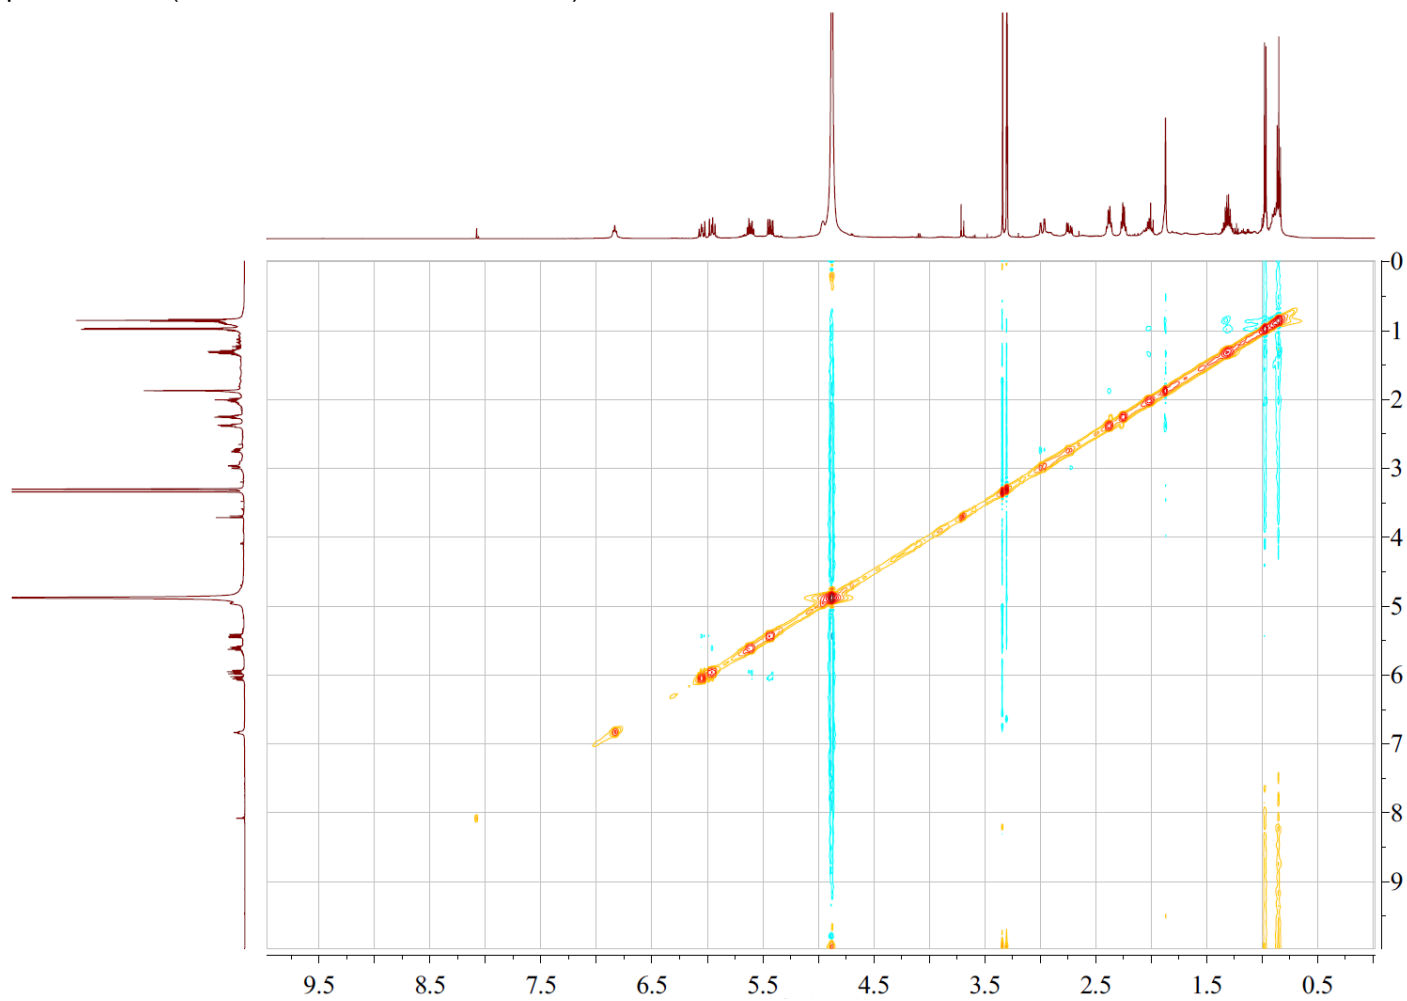

**Figure S6.** The spectroscopic data of **2**

(A) The HRESIMS spectrum of **2**

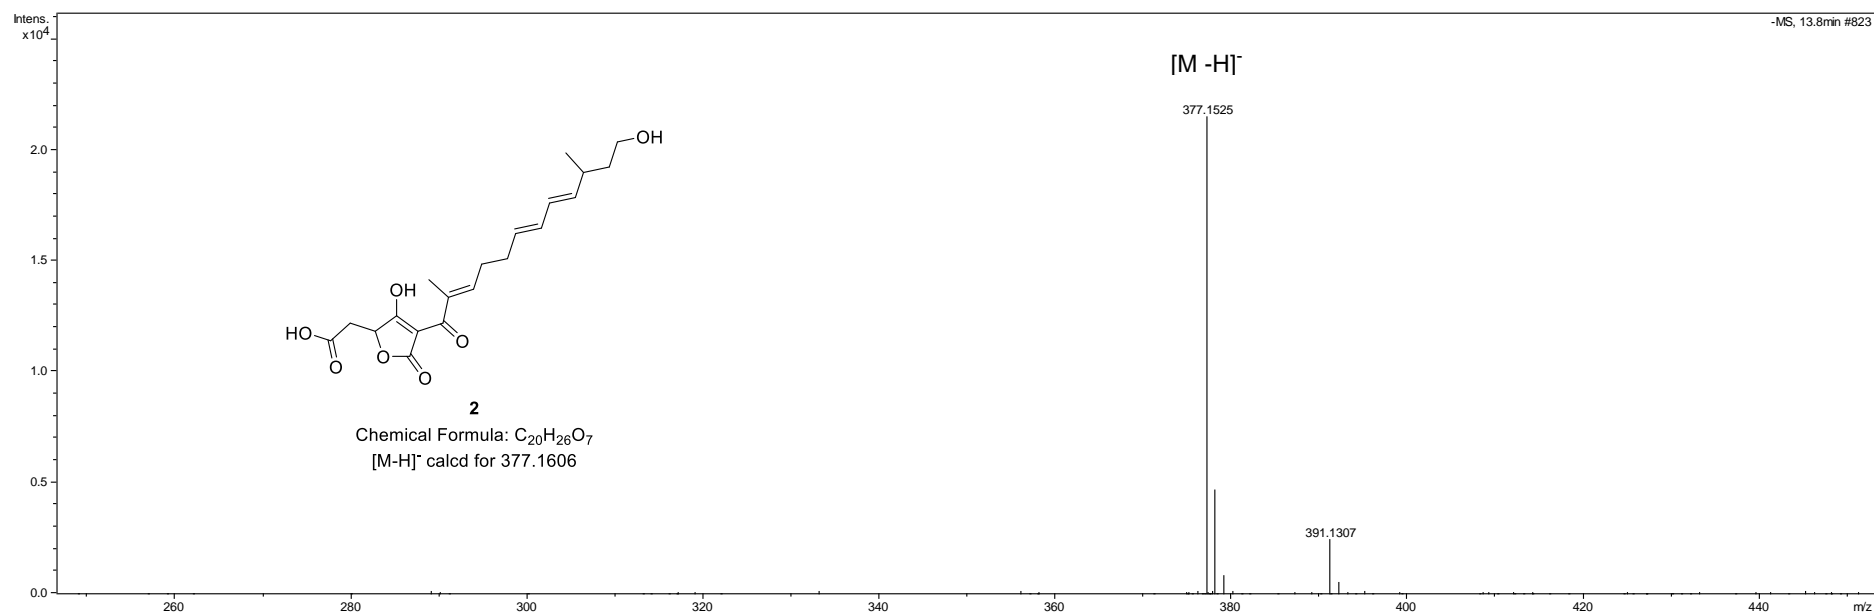

**Figure S6.** The spectroscopic data of **2**  
(B) The <sup>1</sup>H-NMR spectrum of **2** (500 MHz for <sup>1</sup>H NMR in CD<sub>3</sub>OD)

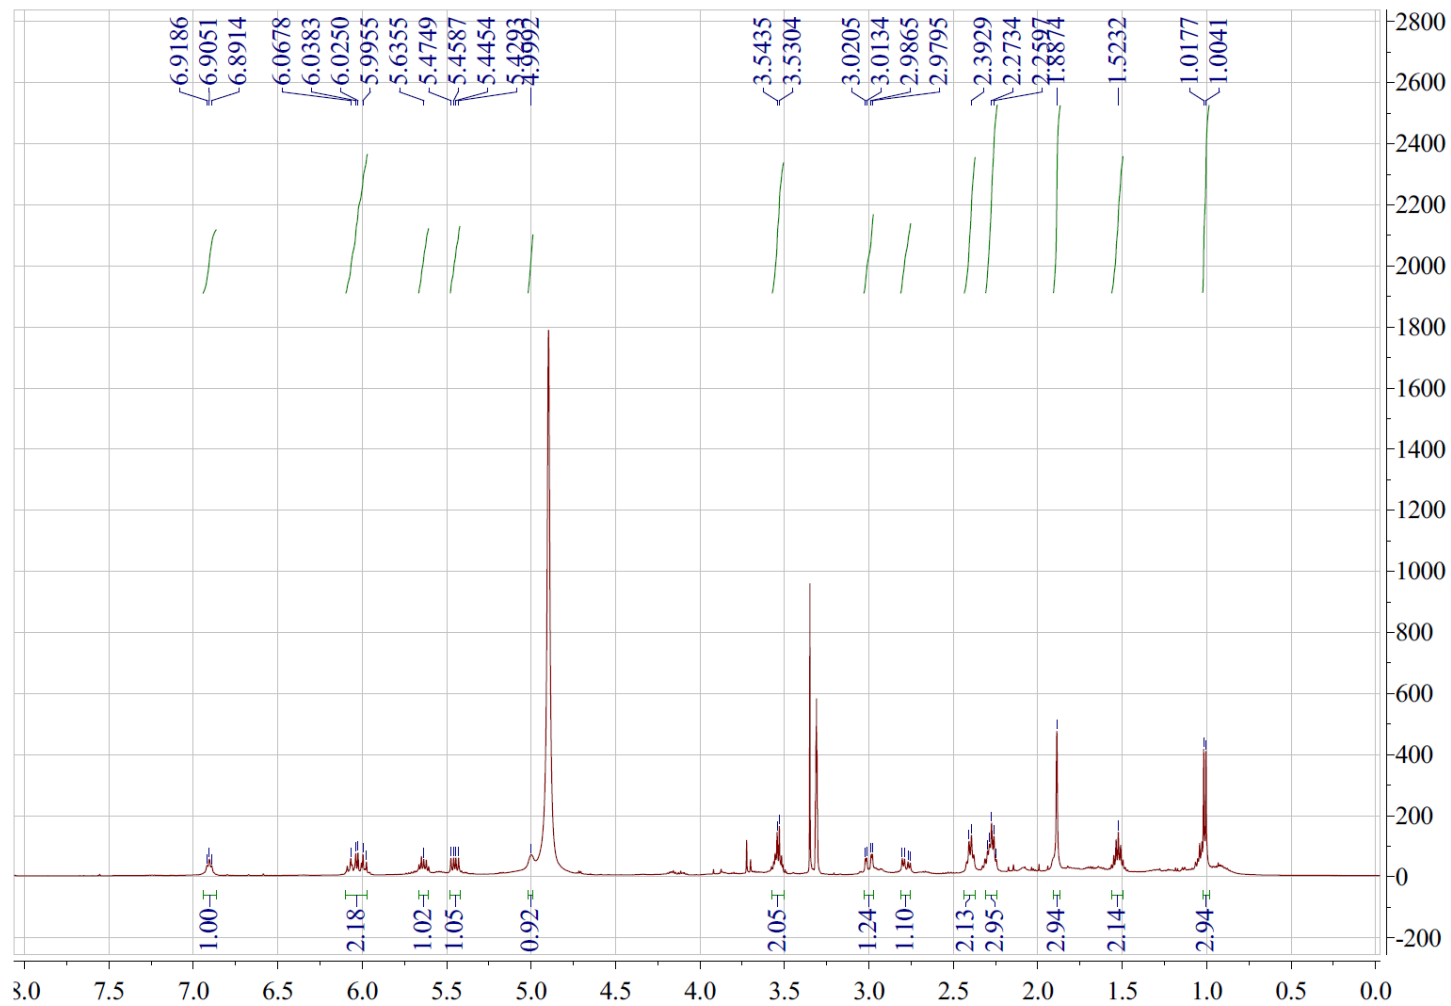



**Figure S6.** The spectroscopic data of **2**  
(C) The  $^{13}\text{C}$  NMR spectrum of compound **2** in  $\text{CD}_3\text{OD}$  (125 MHz)

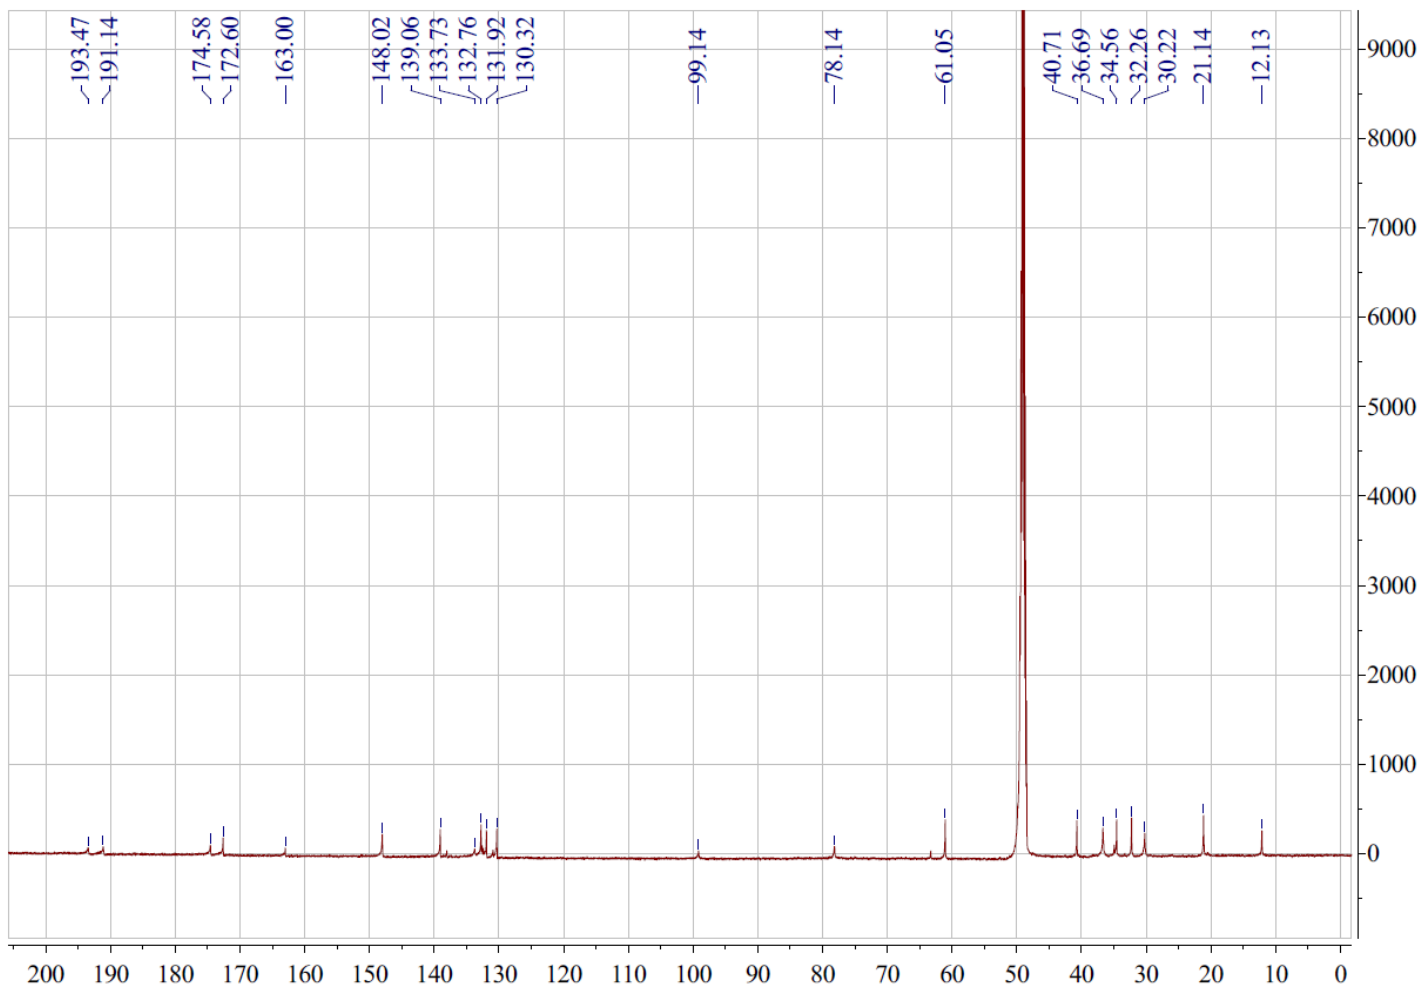

**Figure S6.** The spectroscopic data of **2**  
(D) The HSQC spectrum of compound **2** in CD<sub>3</sub>OD (125 MHz)

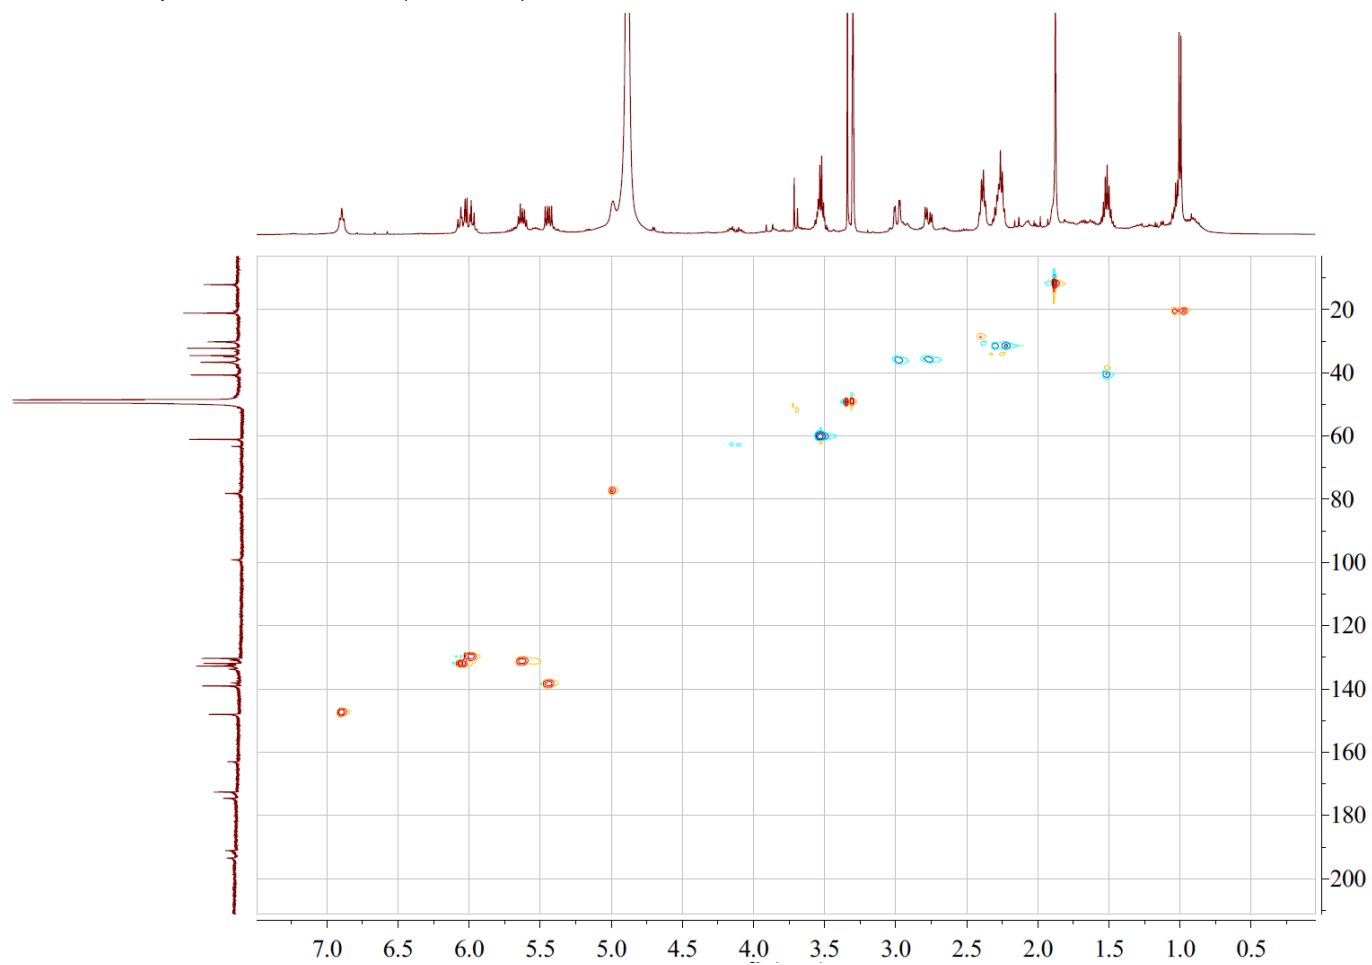

**Figure S6.** The spectroscopic data of **2**  
(E) The HMBC spectrum of **2** (500 MHz for  $^1\text{H}$  NMR in  $\text{CD}_3\text{OD}$ )

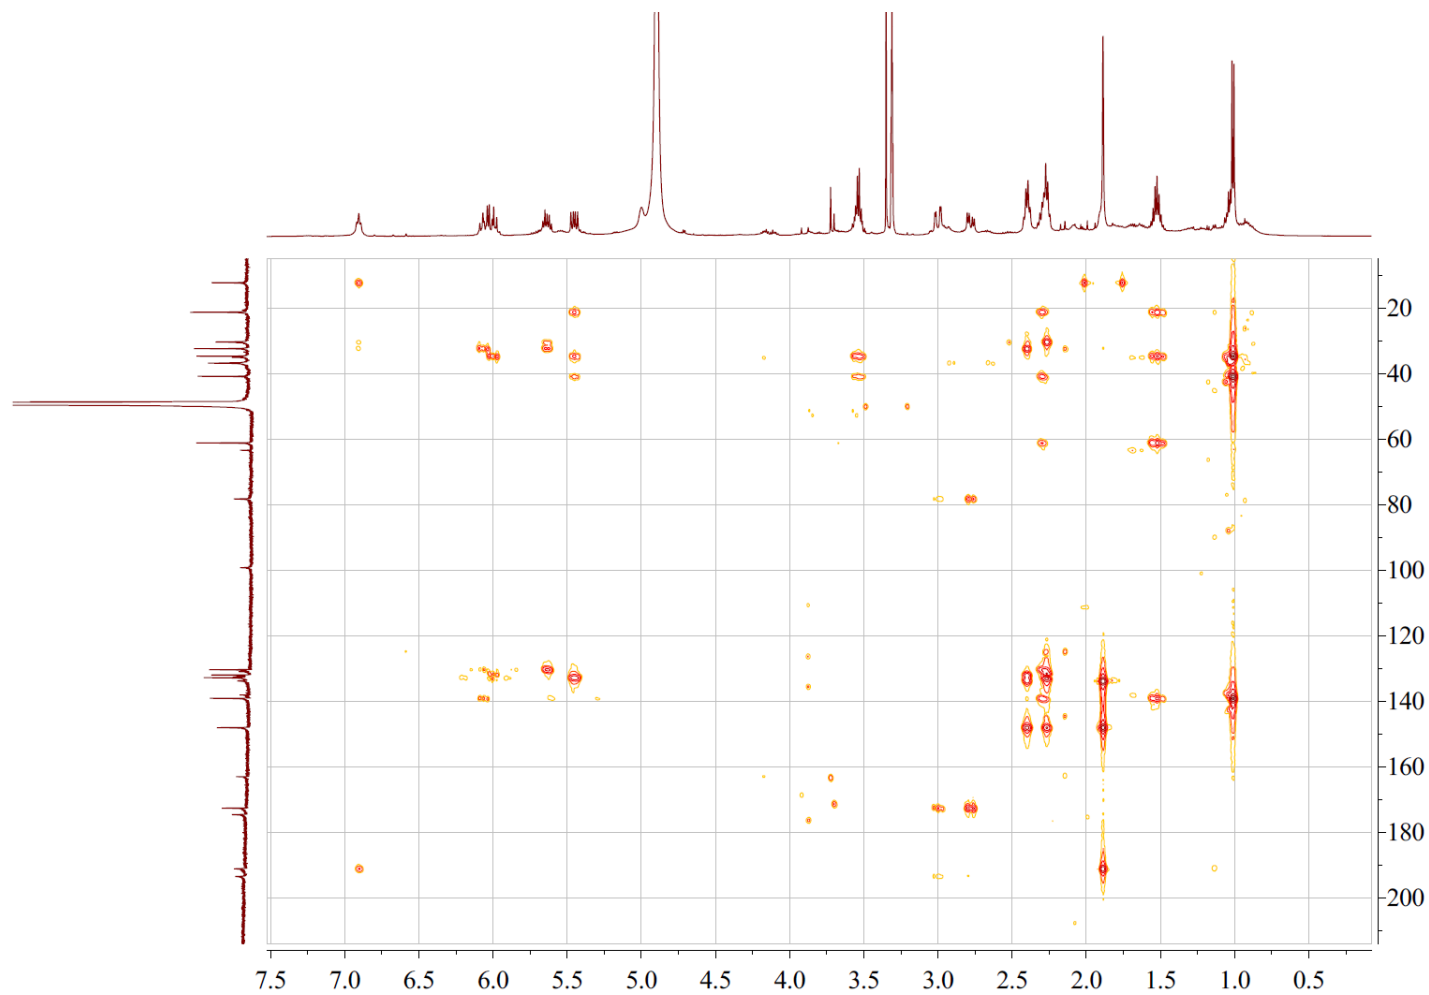

**Figure S6.** The spectroscopic data of **2**  
(F) The  $^1\text{H}$ - $^1\text{H}$  COSY spectrum of **2** (500 MHz for  $^1\text{H}$  NMR in  $\text{CD}_3\text{OD}$ )

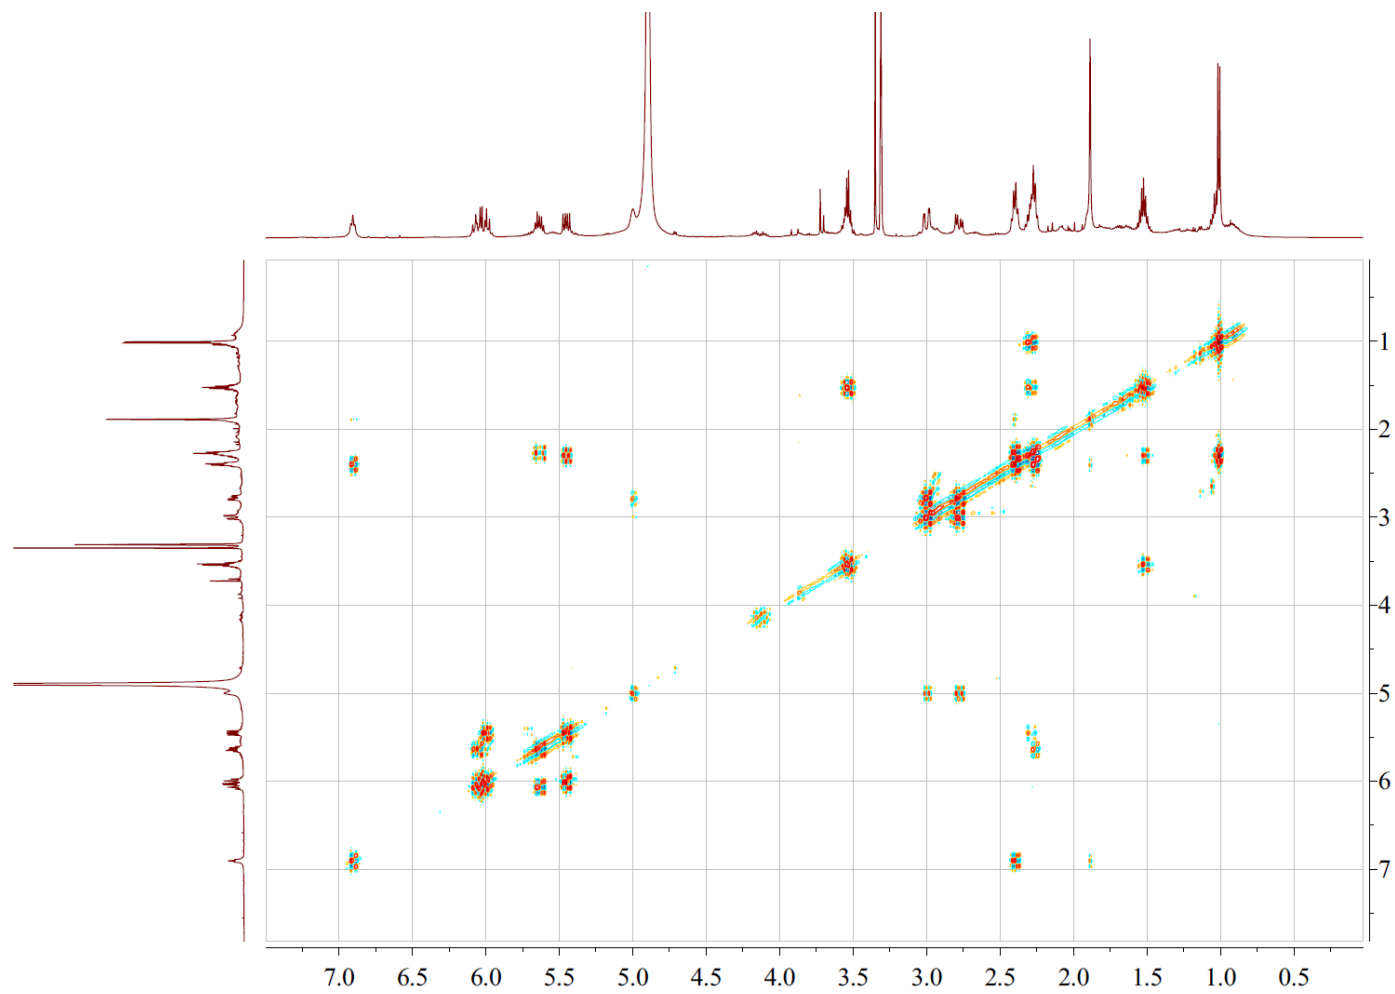

**Figure S6.** The spectroscopic data of **2**  
(G) The NOESY spectrum of **2** (500 MHz for  $^1\text{H}$  NMR in  $\text{CD}_3\text{OD}$ )

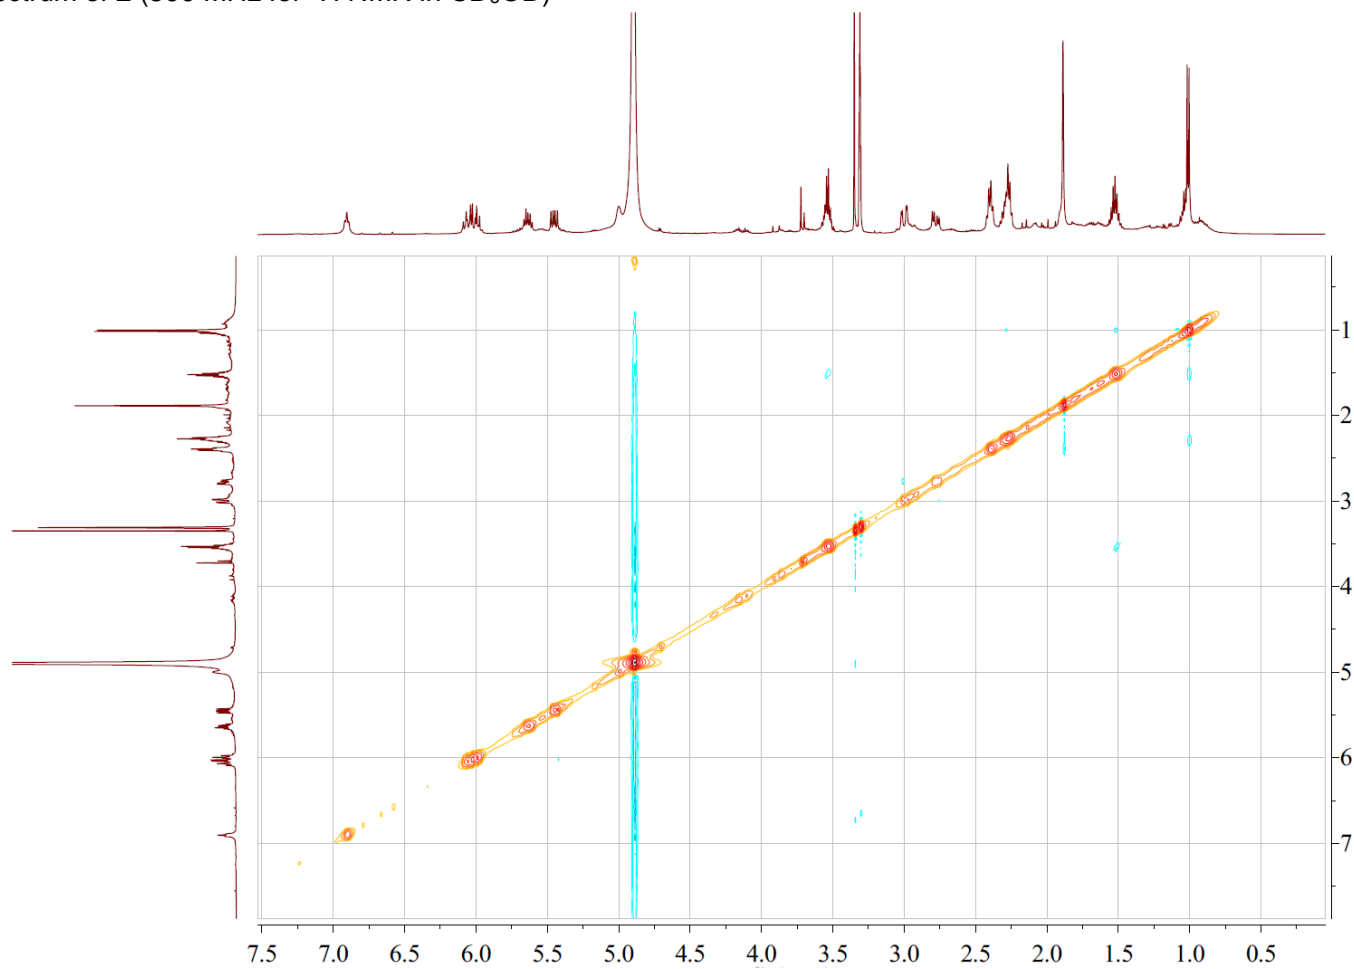

**Figure S7.** The spectroscopic data of **3**

(A) The HRESIMS spectrum of **3**

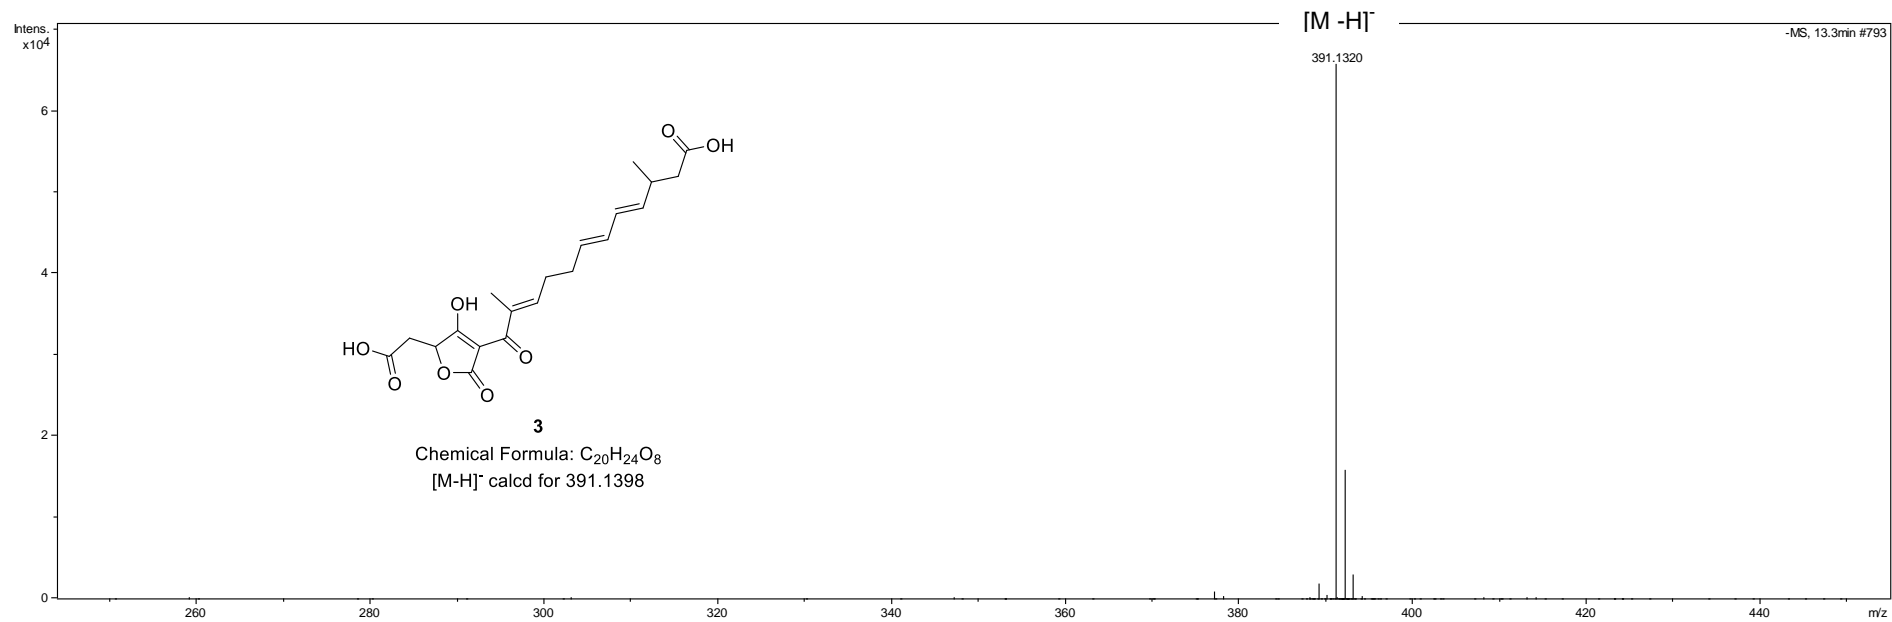

**Figure S7.** The spectroscopic data of **3**

(B) The  $^1\text{H}$ -NMR spectrum of **3** (500 MHz for  $^1\text{H}$  NMR in  $\text{CD}_3\text{OD}$ )

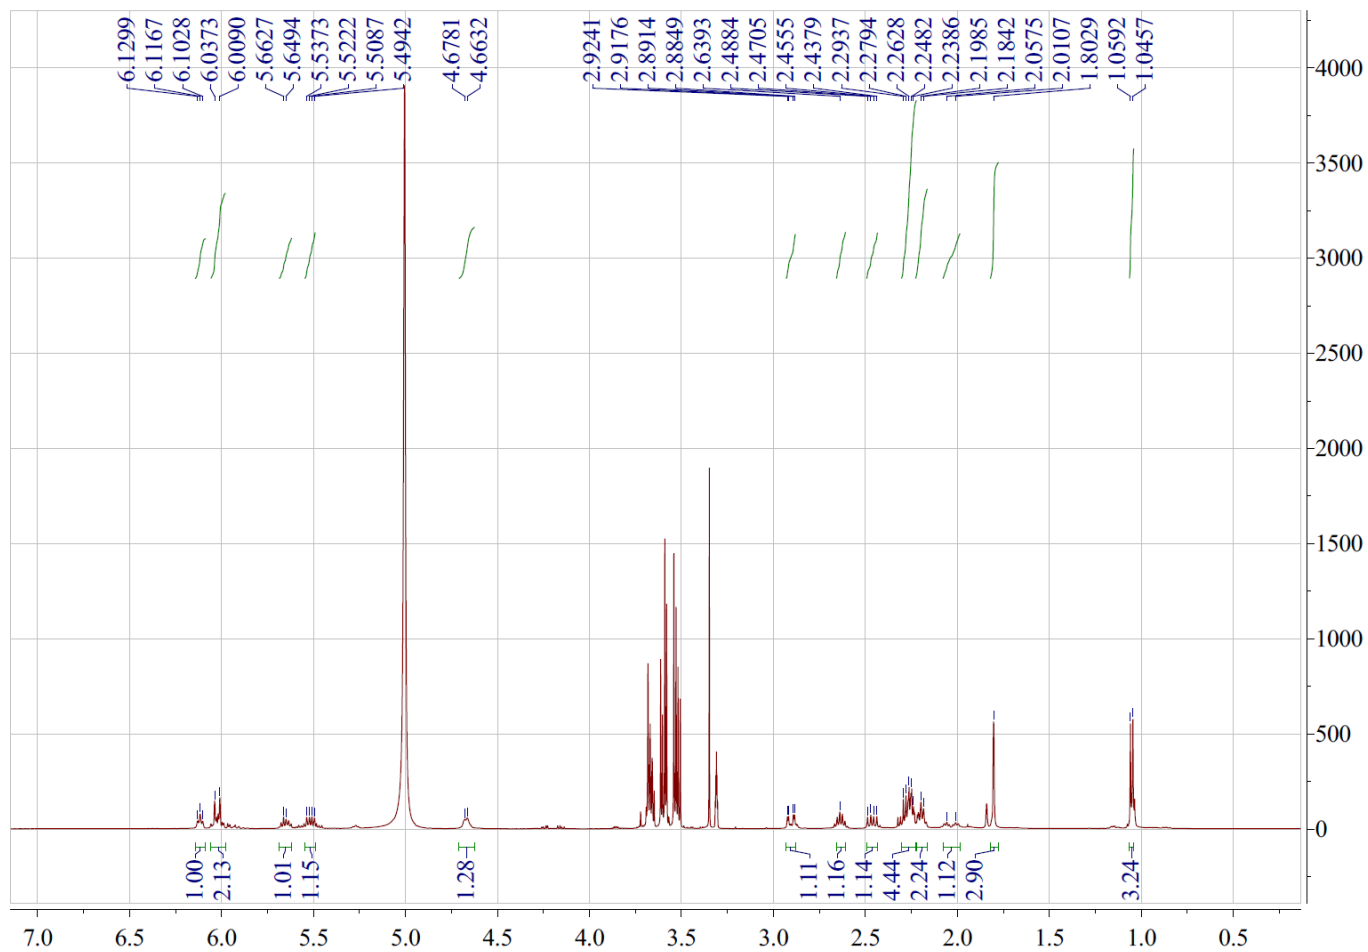

**Figure S7.** The spectroscopic data of **3**

(C) The  $^{13}\text{C}$  NMR spectrum of compound **3** in  $\text{CD}_3\text{OD}$  (125 MHz)

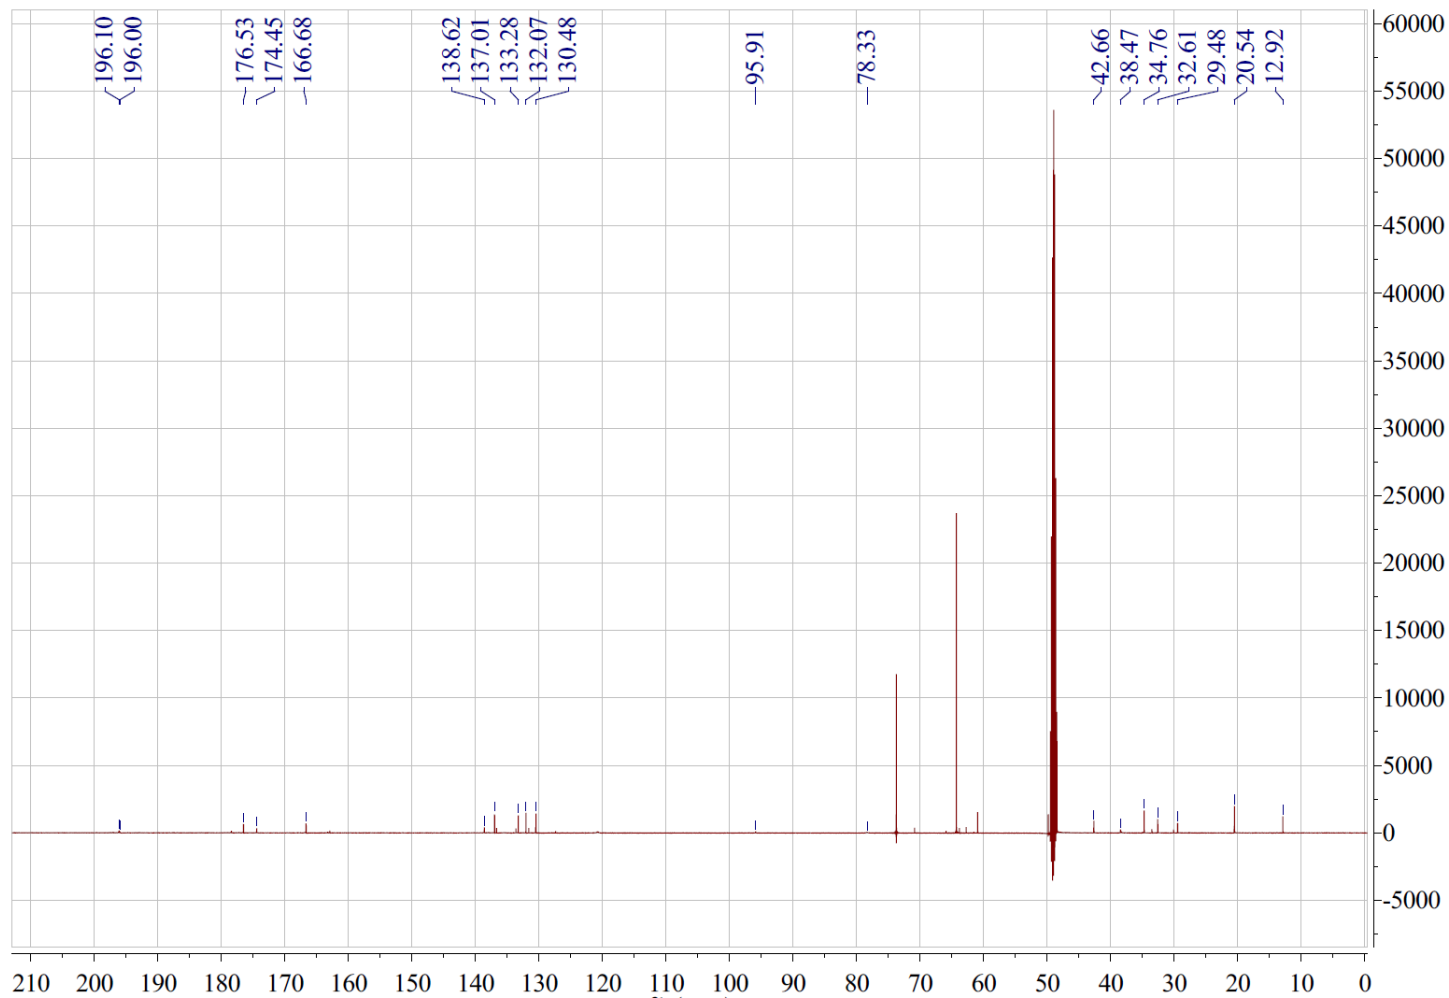



**Figure S7.** The spectroscopic data of **3**  
(D) The HSQC spectrum of compound **3** in CD<sub>3</sub>OD (125 MHz)

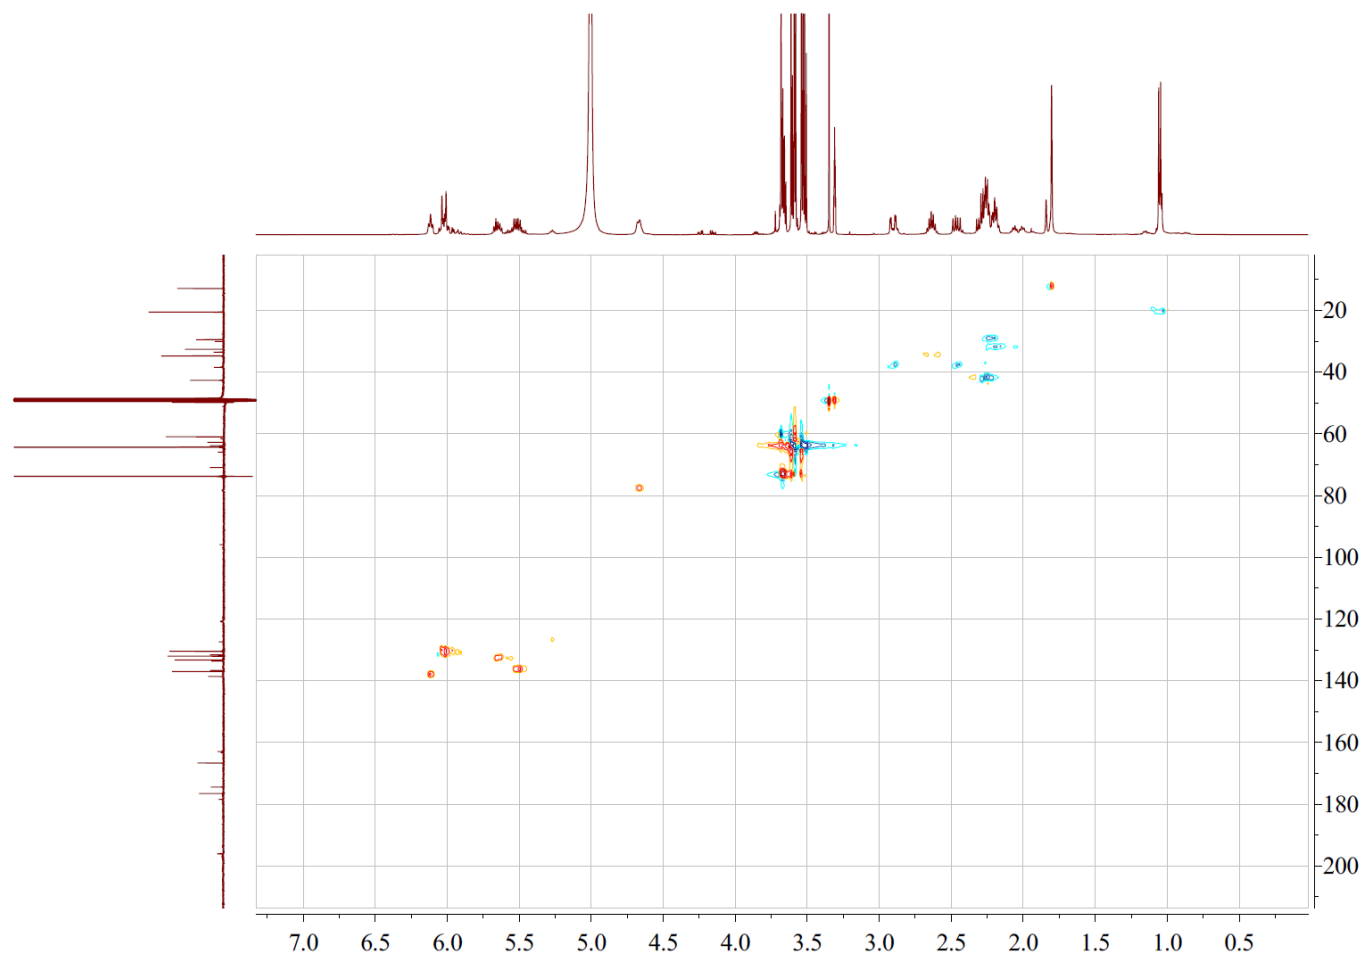

**Figure S7.** The spectroscopic data of **3**  
(E) The HMBC spectrum of **3** (500 MHz for  $^1\text{H}$  NMR in  $\text{CD}_3\text{OD}$ )

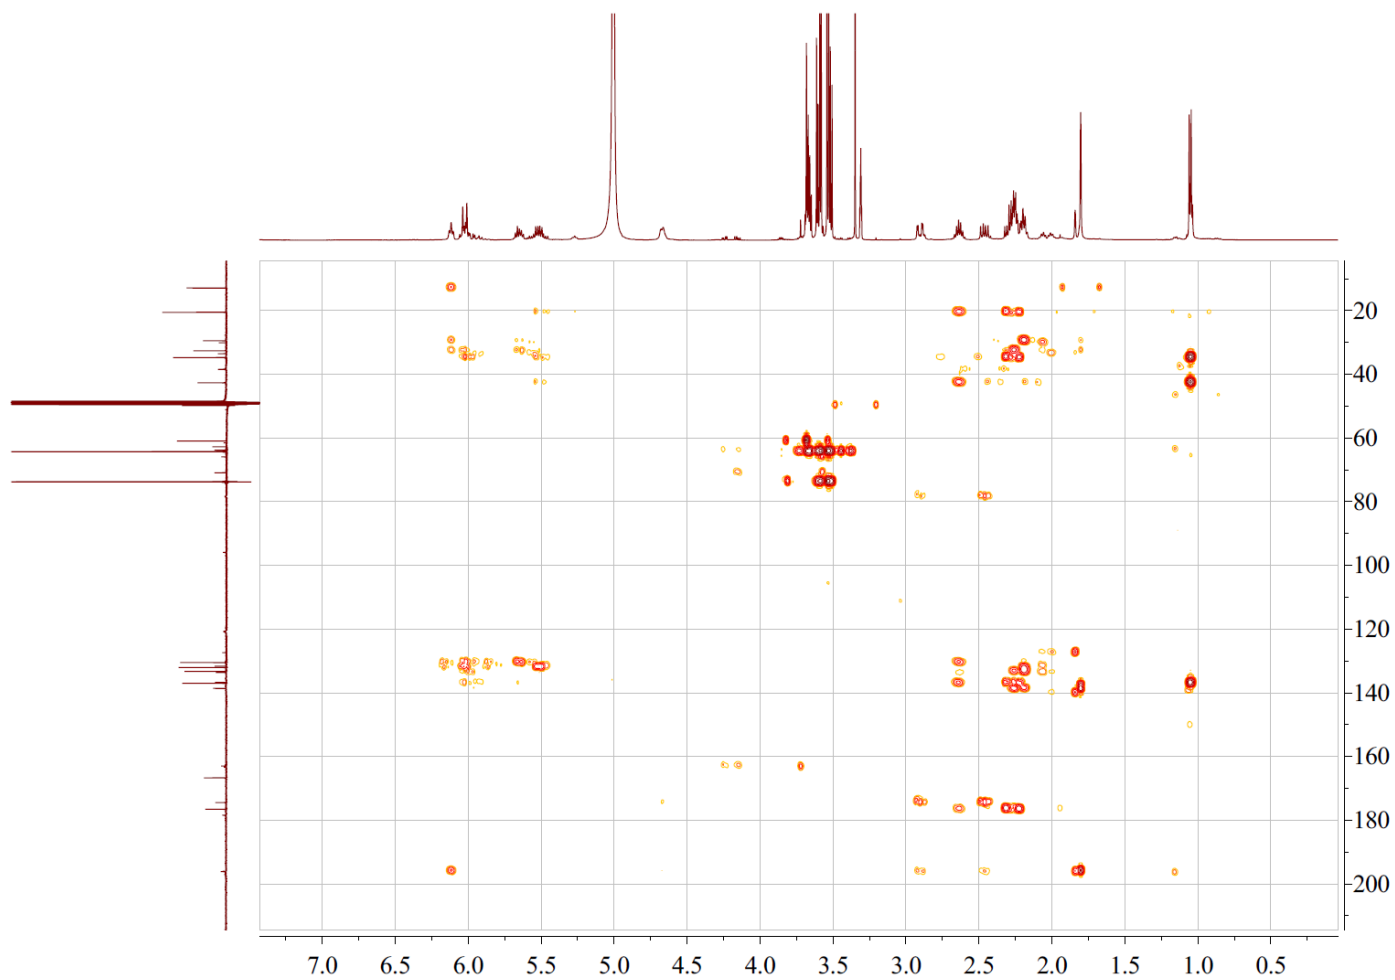

**Figure S7.** The spectroscopic data of **3**

(F) The  $^1\text{H}$ - $^1\text{H}$  COSY spectrum of **3** (500 MHz for  $^1\text{H}$  NMR in  $\text{CD}_3\text{OD}$ )

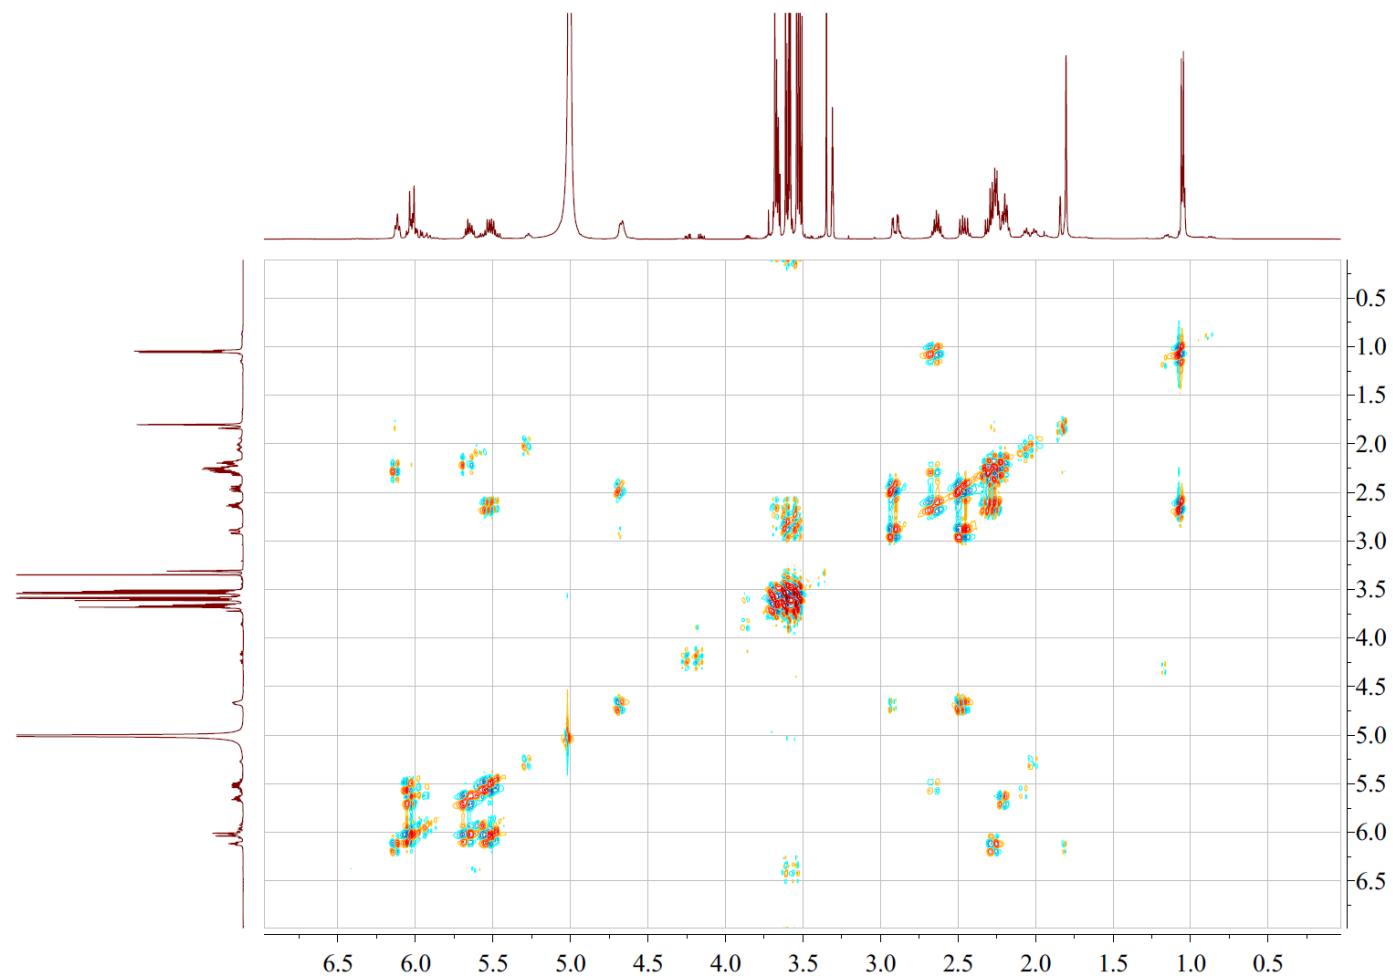

**Figure S8.** The spectroscopic data of **4**

(A) The HRESIMS spectrum of **4**

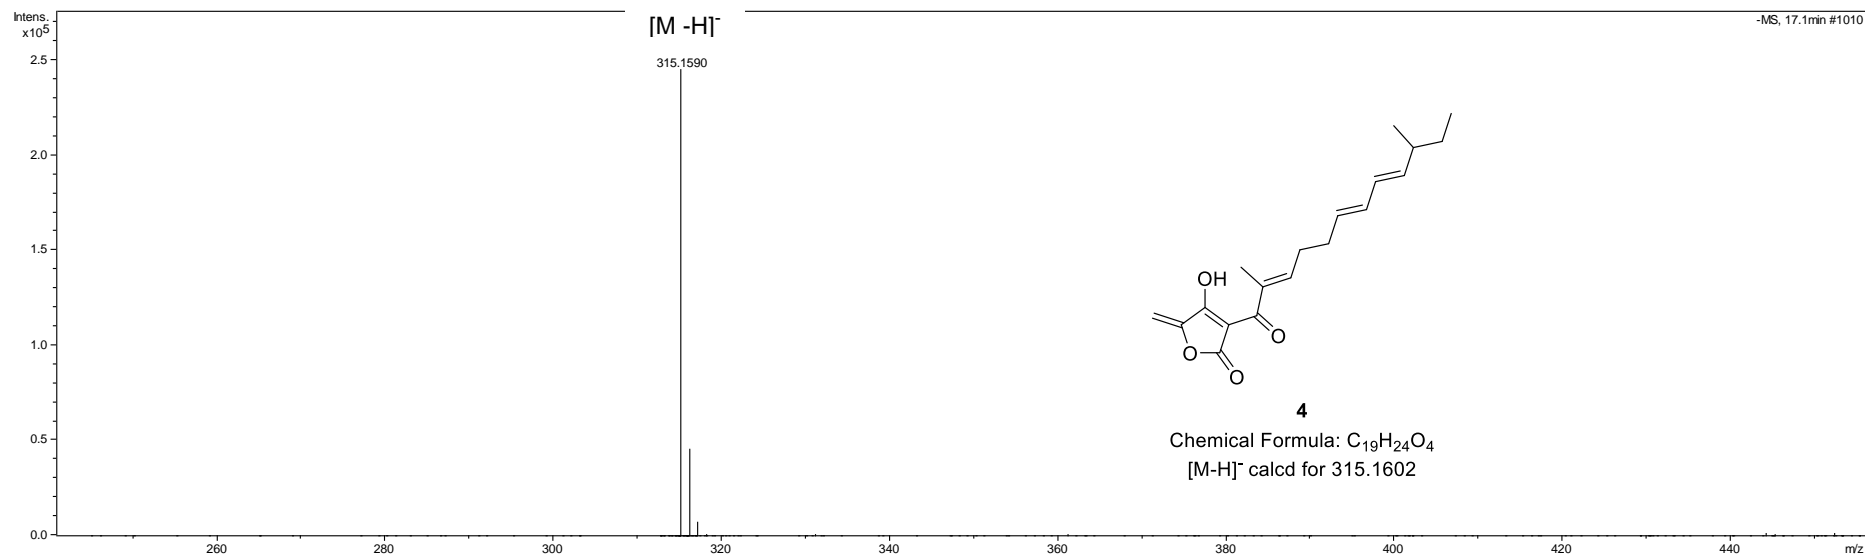

**Figure S8.** The spectroscopic data of **4**

(B) The  $^1\text{H-NMR}$  spectrum of **4** (500 MHz for  $^1\text{H}$  NMR in  $\text{DMSO-}d_6$ )

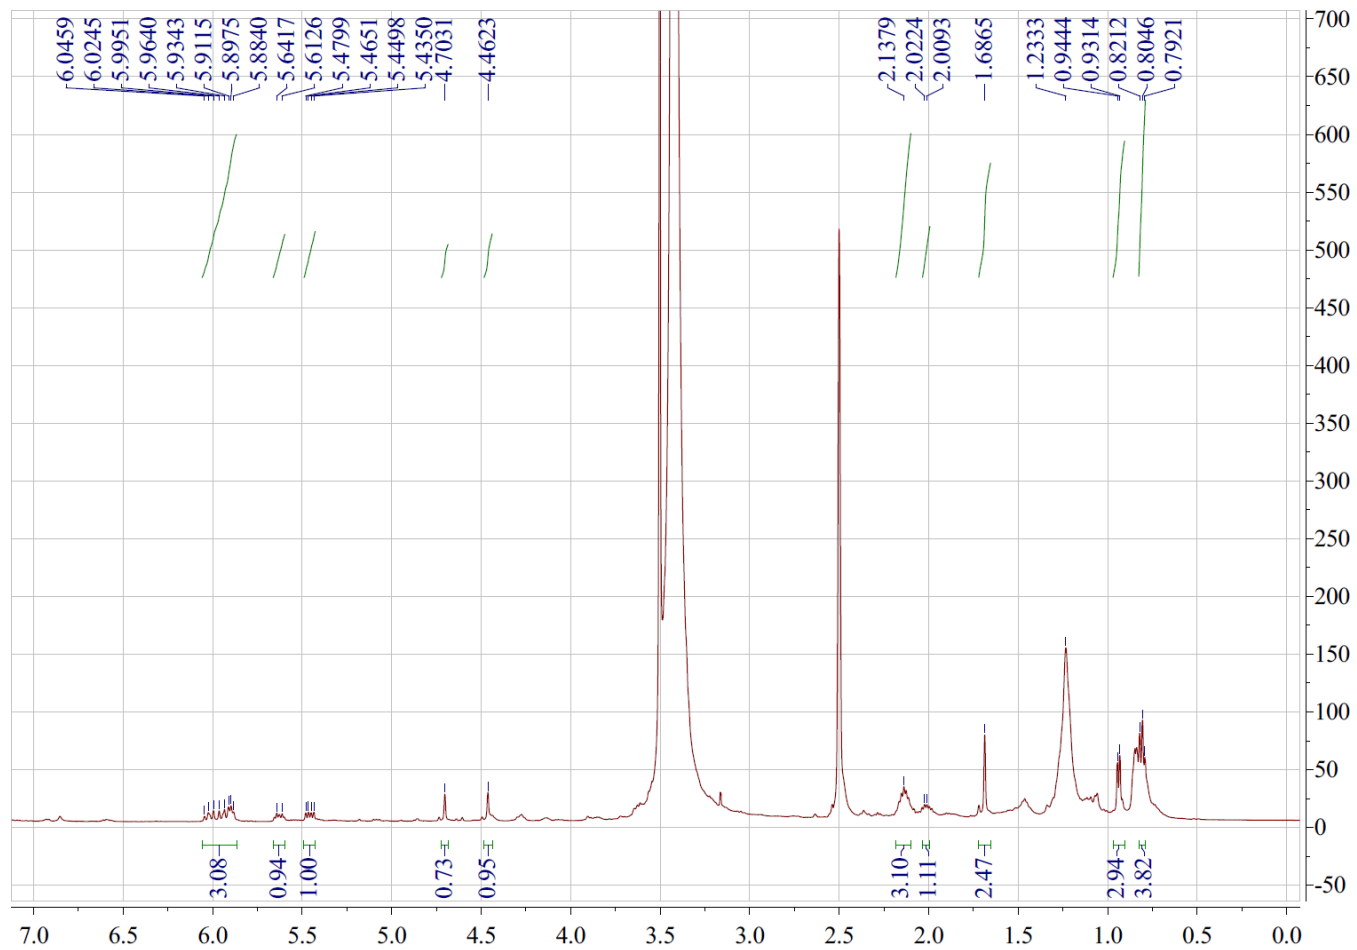

**Figure S8.** The spectroscopic data of **4**

(C) The  $^{13}\text{C}$  NMR spectrum of compound **4** in  $\text{DMSO-}d_6$  (125 MHz)

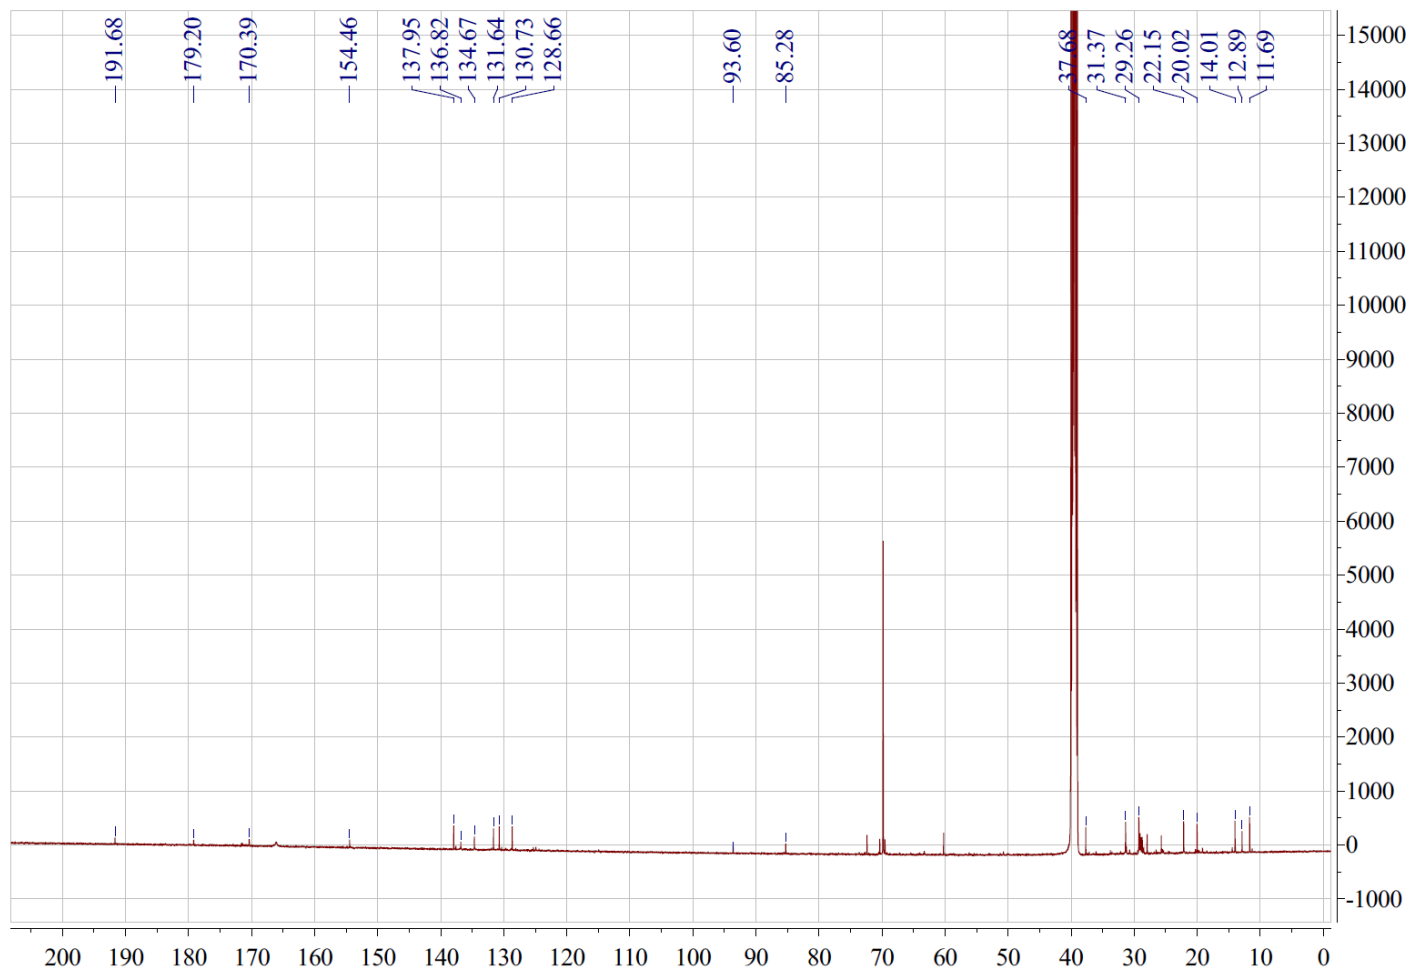

**Figure S8.** The spectroscopic data of **4**  
(D) The HSQC spectrum of compound **4** in DMSO- $d_6$  (125 MHz)

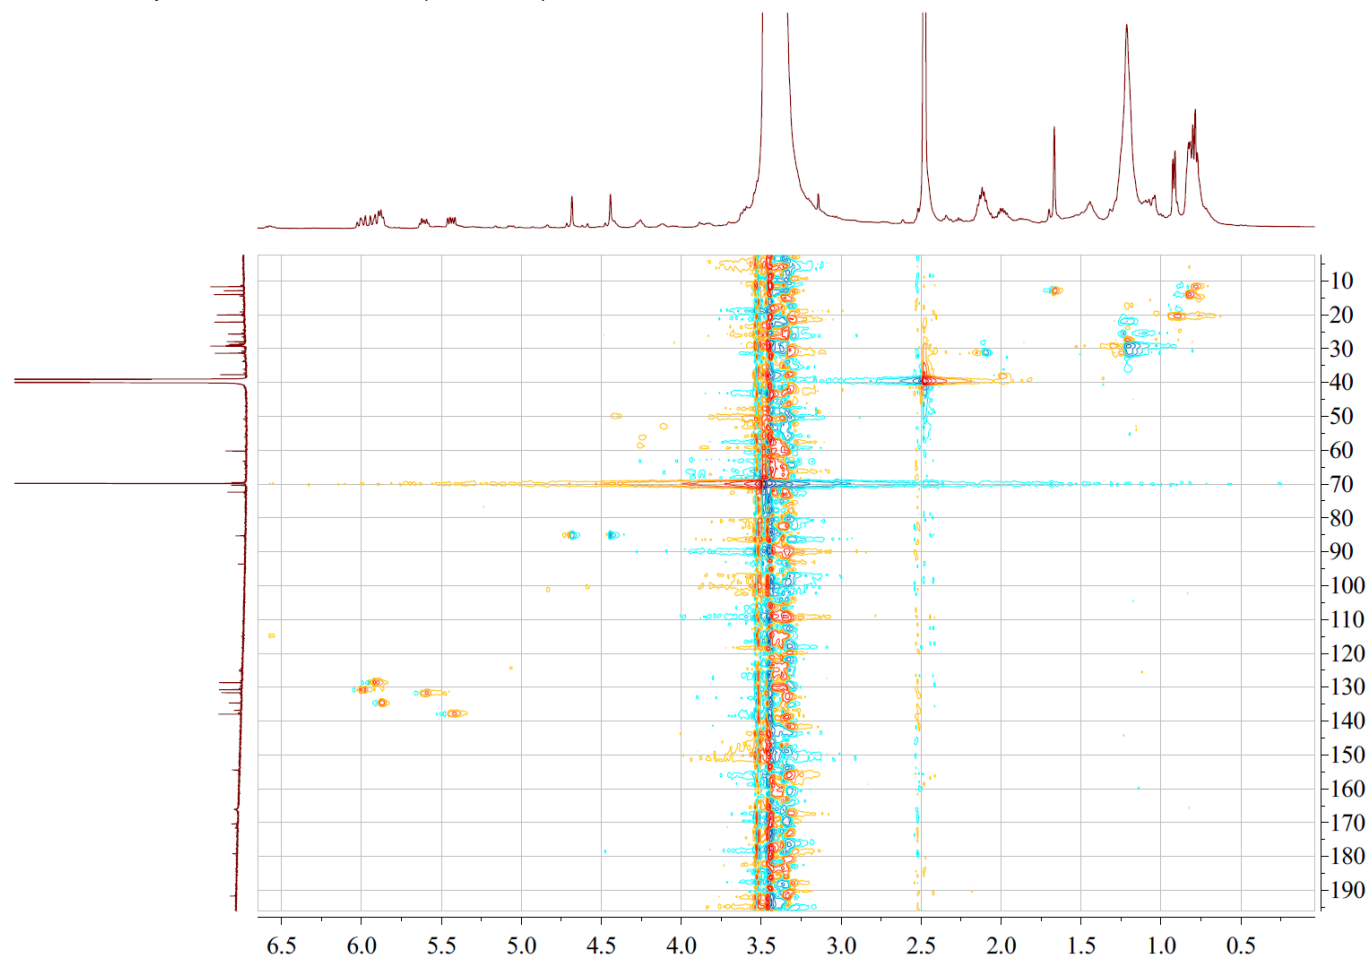

**Figure S8.** The spectroscopic data of **4**  
(E) The HMBC spectrum of **4** (500 MHz for  $^1\text{H}$  NMR in  $\text{DMSO-}d_6$ )

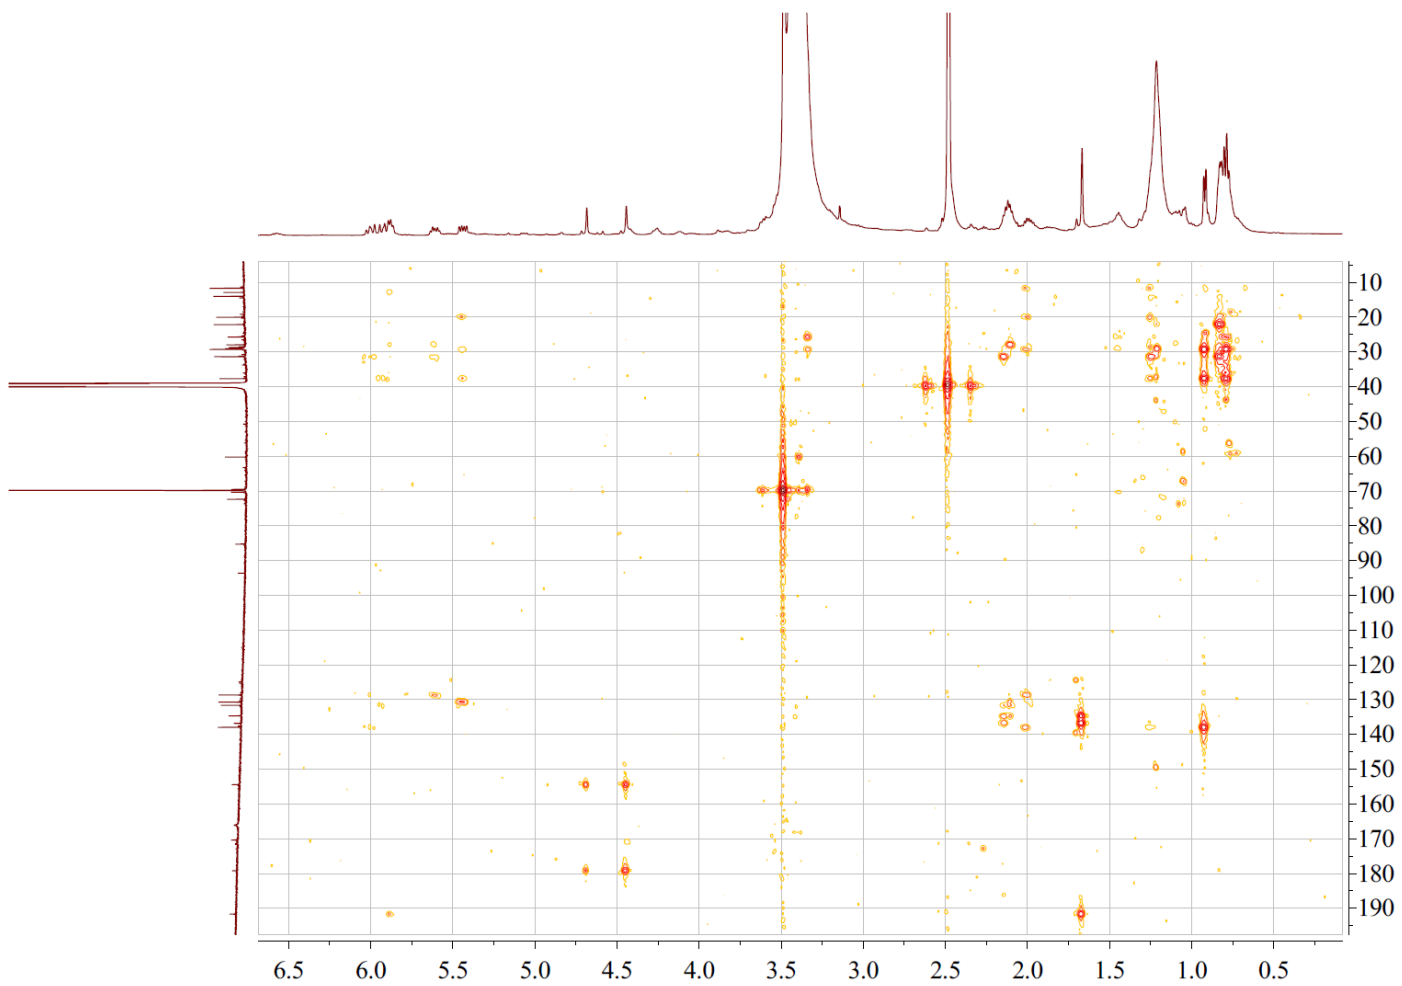



**Figure S8.** The spectroscopic data of **4**

(F) The  $^1\text{H}$ - $^1\text{H}$  COSY spectrum of **4** (500 MHz for  $^1\text{H}$  NMR in  $\text{DMSO-}d_6$ )

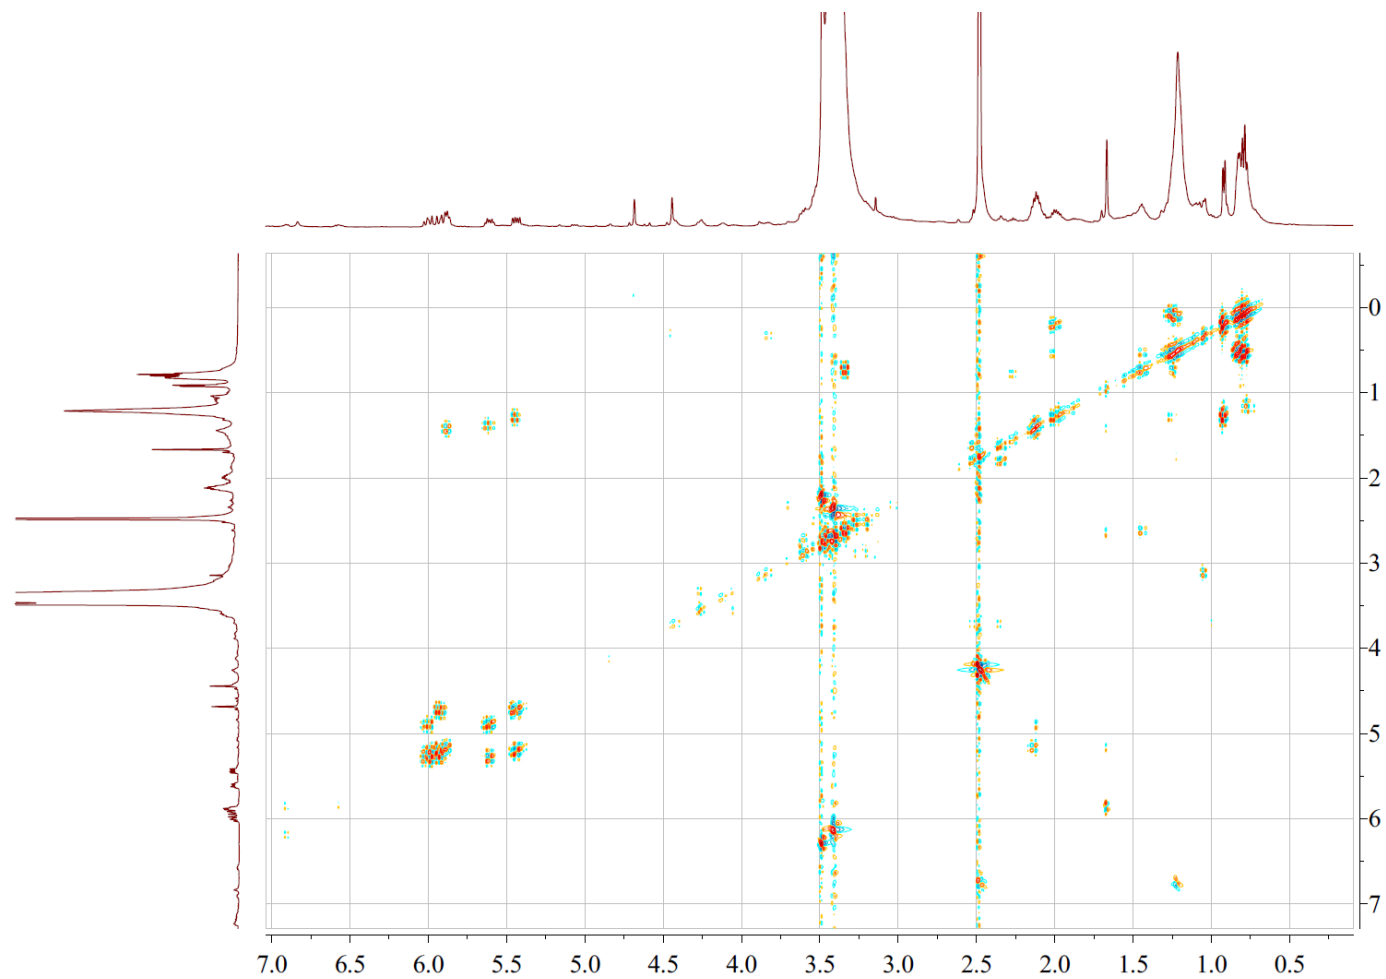

**Figure S9.** The spectroscopic data of **5**

(A) The HRESIMS spectrum of **5**

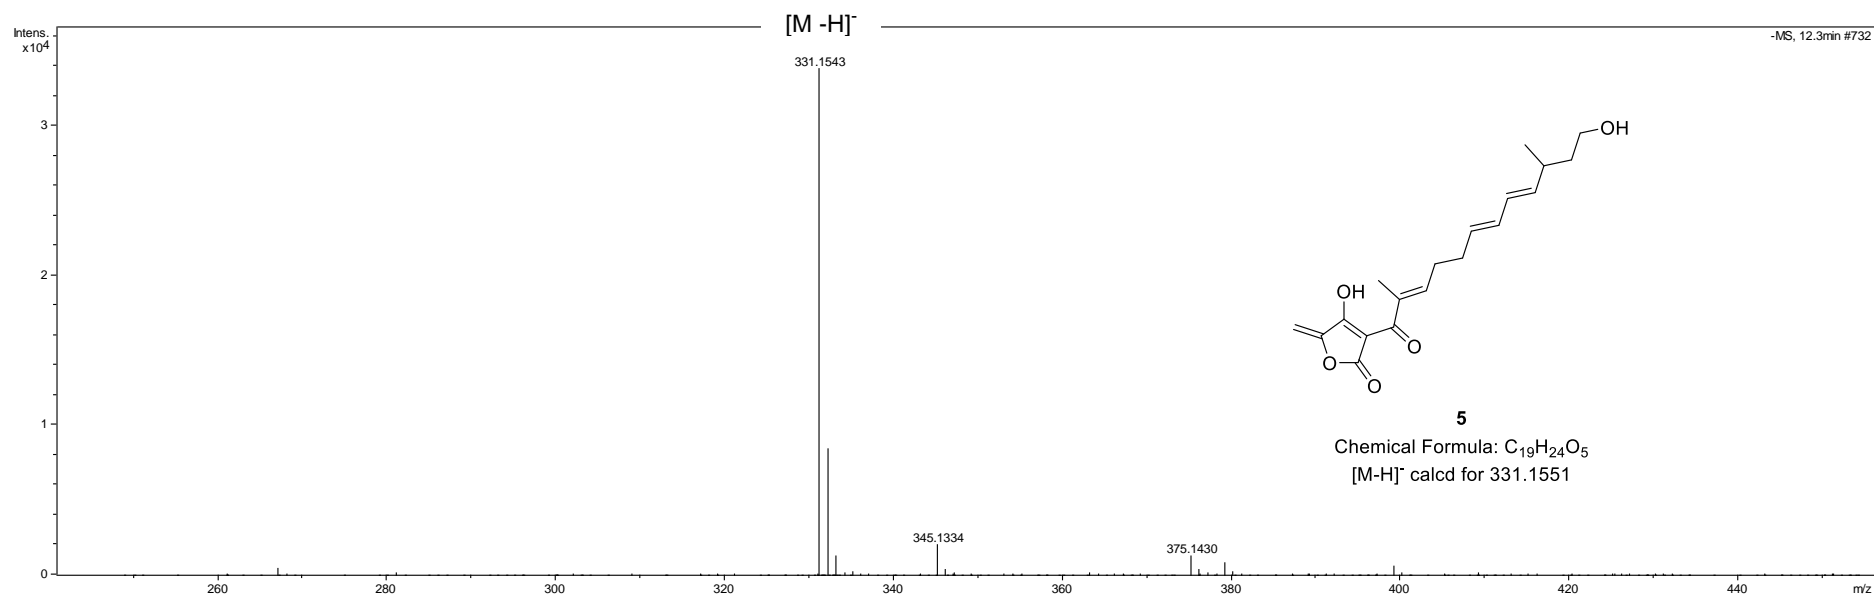

**Figure S9.** The spectroscopic data of **5**

(B) The  $^1\text{H-NMR}$  spectrum of **5** (500 MHz for  $^1\text{H}$  NMR in  $\text{CDCl}_3$ )

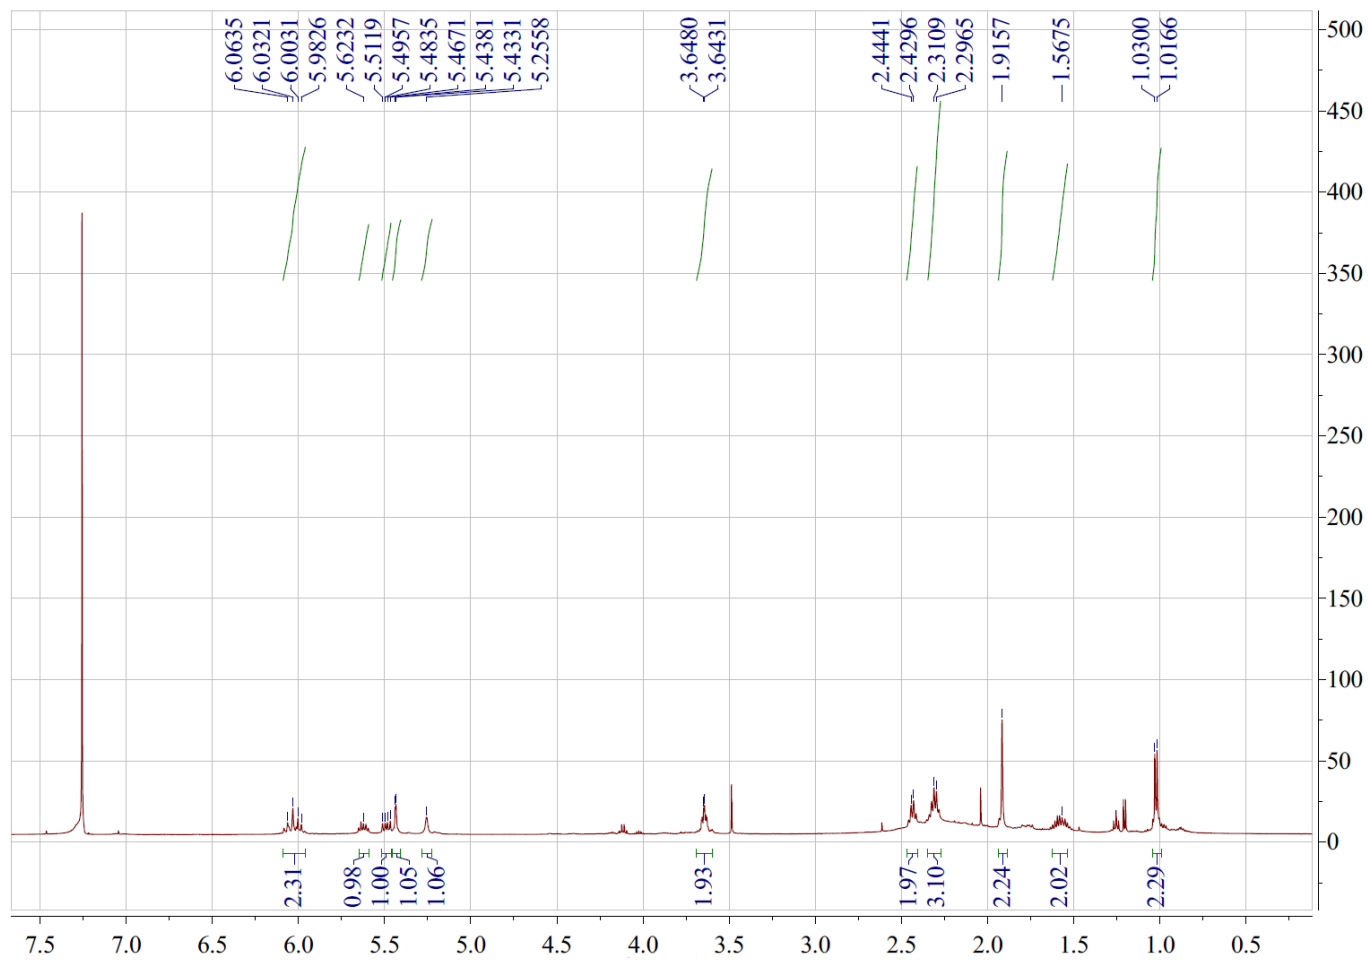

**Figure S9.** The spectroscopic data of **5**  
(C) The  $^{13}\text{C}$  NMR spectrum of compound **5** in  $\text{CDCl}_3$  (125 MHz)

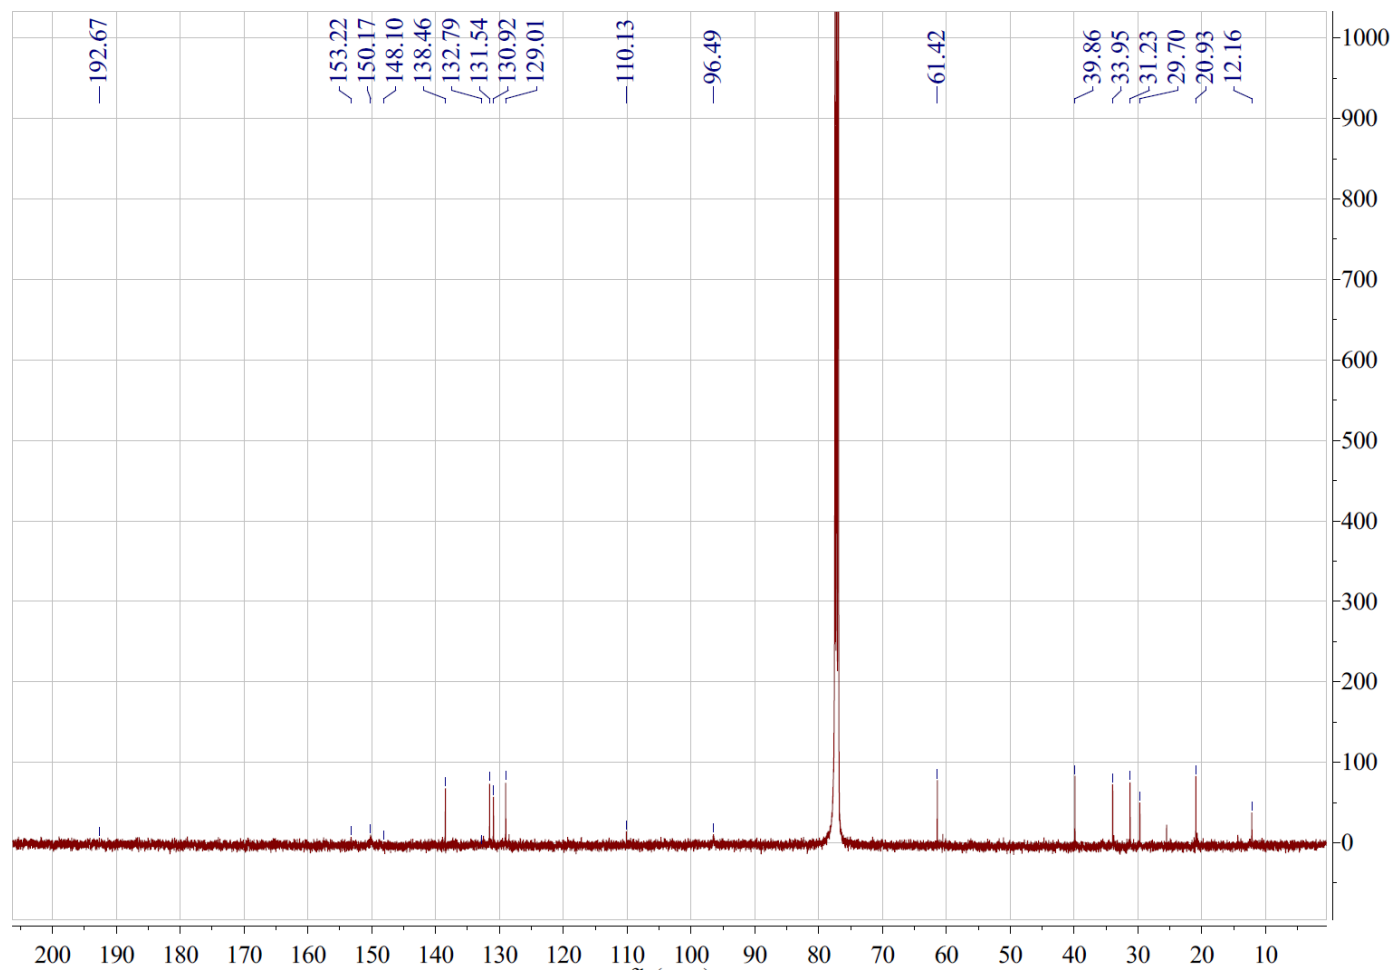

**Figure S9.** The spectroscopic data of **5**  
(D) The HSQC spectrum of compound **5** in CDCl<sub>3</sub> (125 MHz)

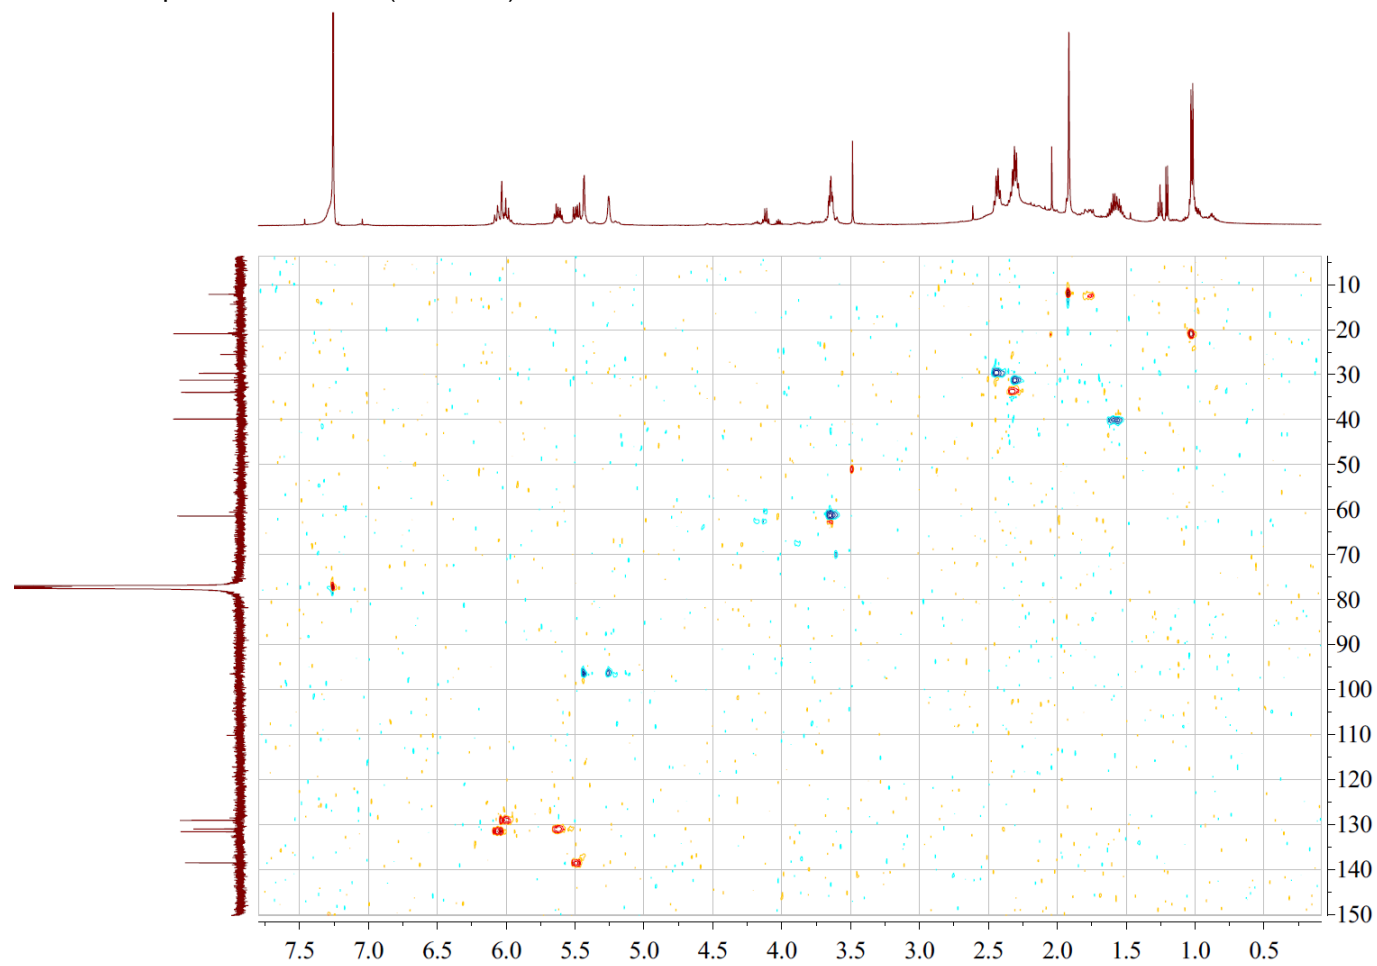

**Figure S9.** The spectroscopic data of **5**  
(E) The HMBC spectrum of **5** (500 MHz for  $^1\text{H}$  NMR in  $\text{CDCl}_3$ )

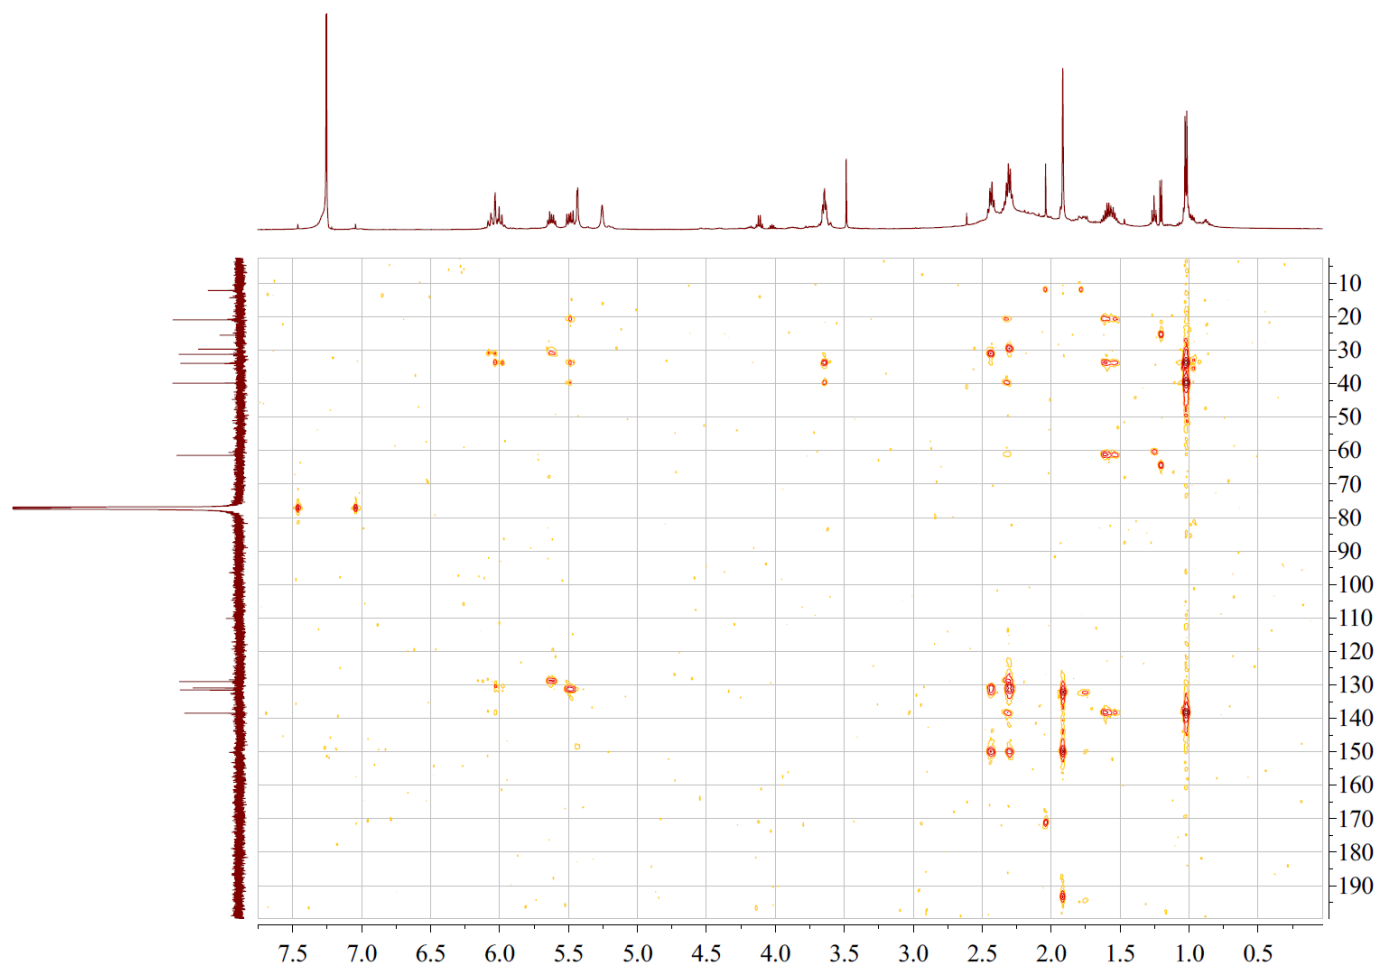

**Figure S9.** The spectroscopic data of **5**  
(F) The  $^1\text{H}$ - $^1\text{H}$  COSY spectrum of **5** (500 MHz for  $^1\text{H}$  NMR in  $\text{CDCl}_3$ )

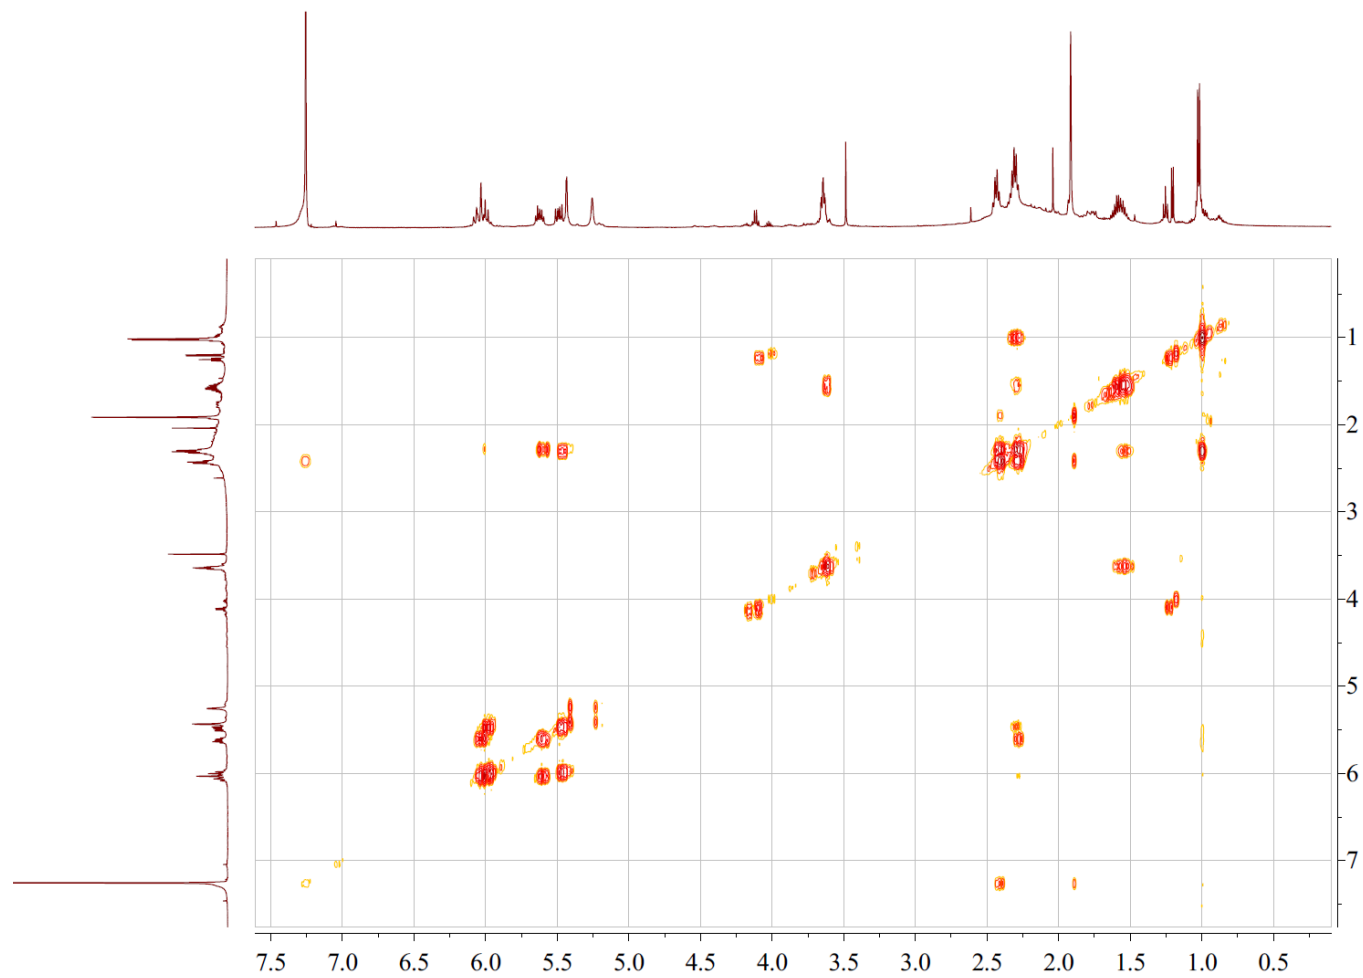

**Figure S10.** The spectroscopic data of **6**

(A) The HRESIMS spectrum of **6**

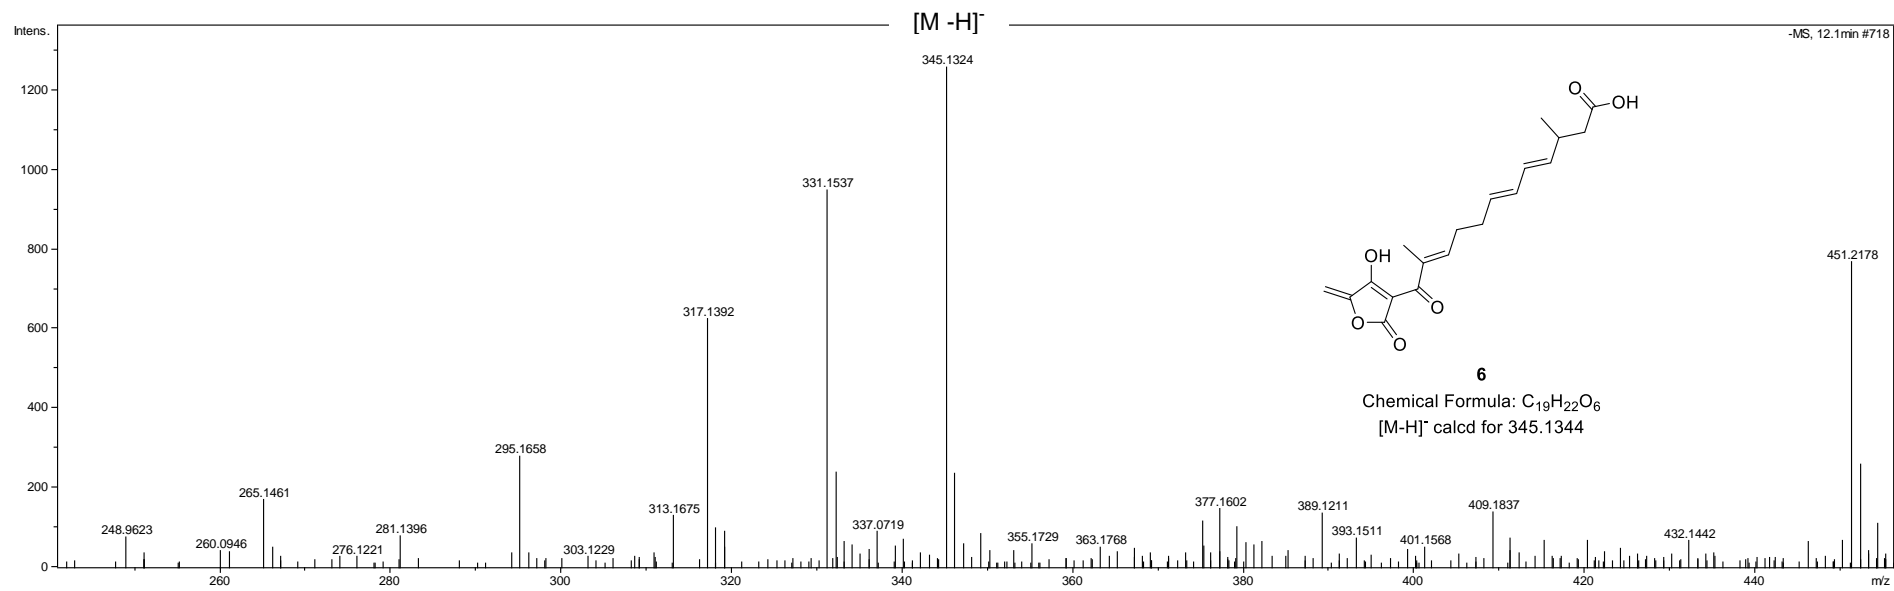



**Figure S10.** The spectroscopic data of **6**  
(B) The  $^1\text{H-NMR}$  spectrum of **6** (500 MHz for  $^1\text{H}$  NMR in  $\text{CD}_3\text{OD}$ )

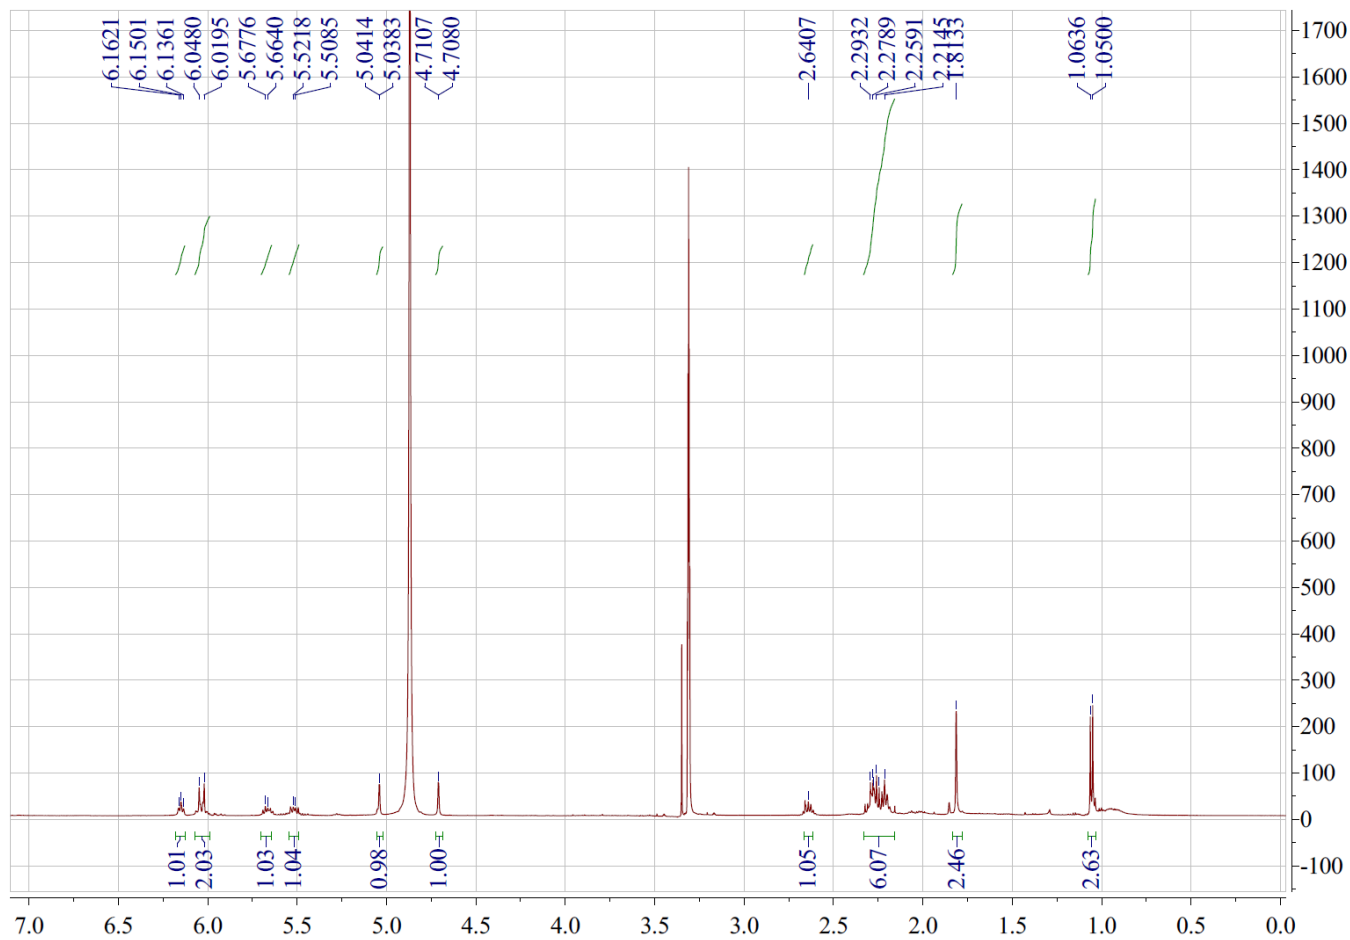

**Figure S10.** The spectroscopic data of **6**

(C) The  $^{13}\text{C}$  NMR spectrum of compound **6** in  $\text{CD}_3\text{OD}$  (125 MHz)

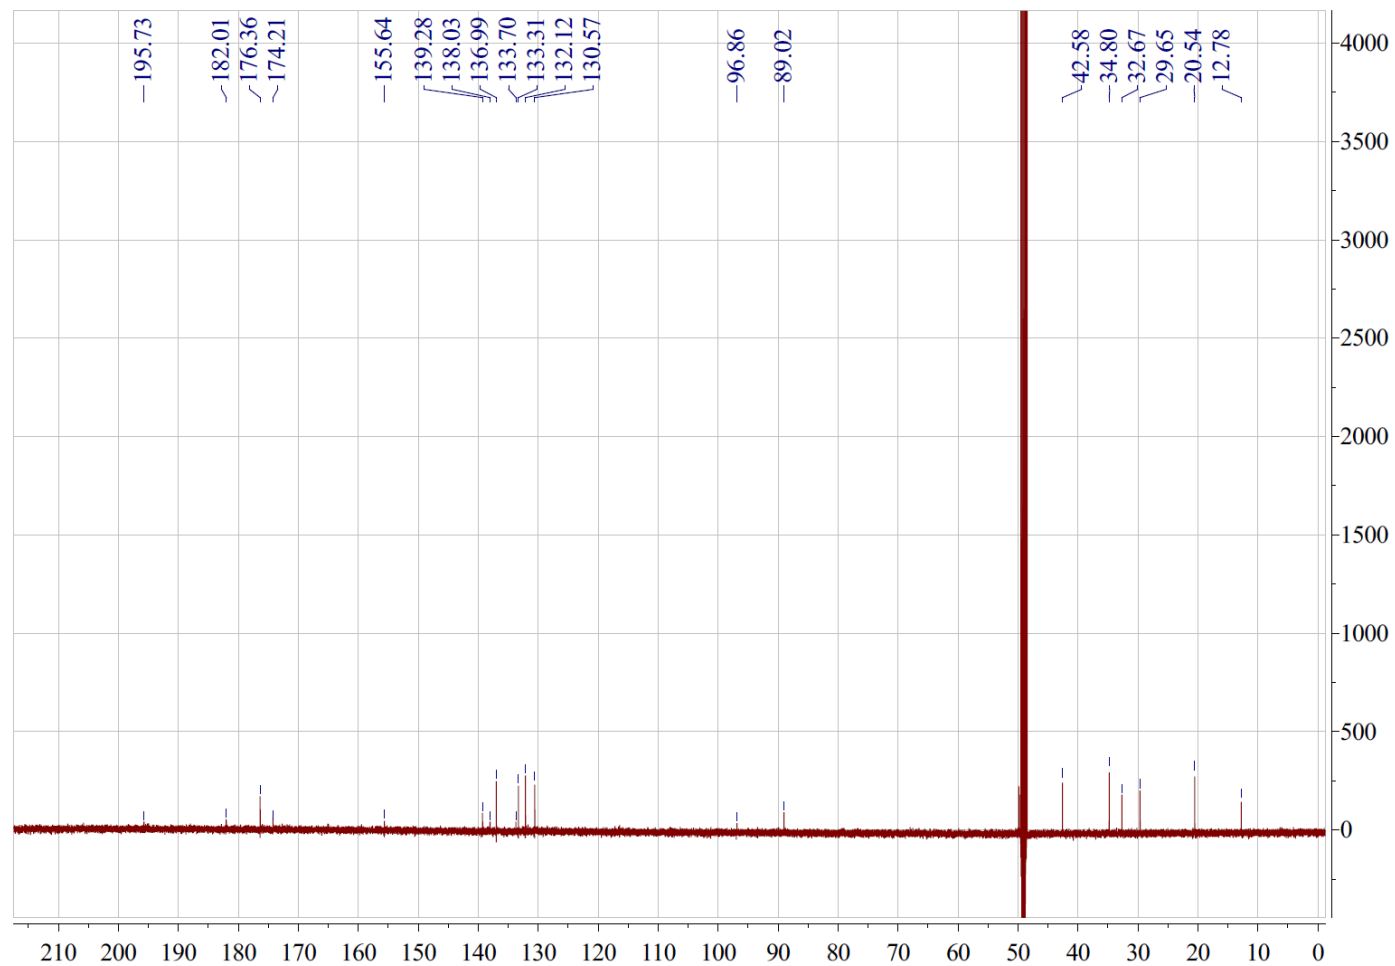

**Figure S10.** The spectroscopic data of **6**  
(D) The HSQC spectrum of compound **6** in CD<sub>3</sub>OD (125 MHz)

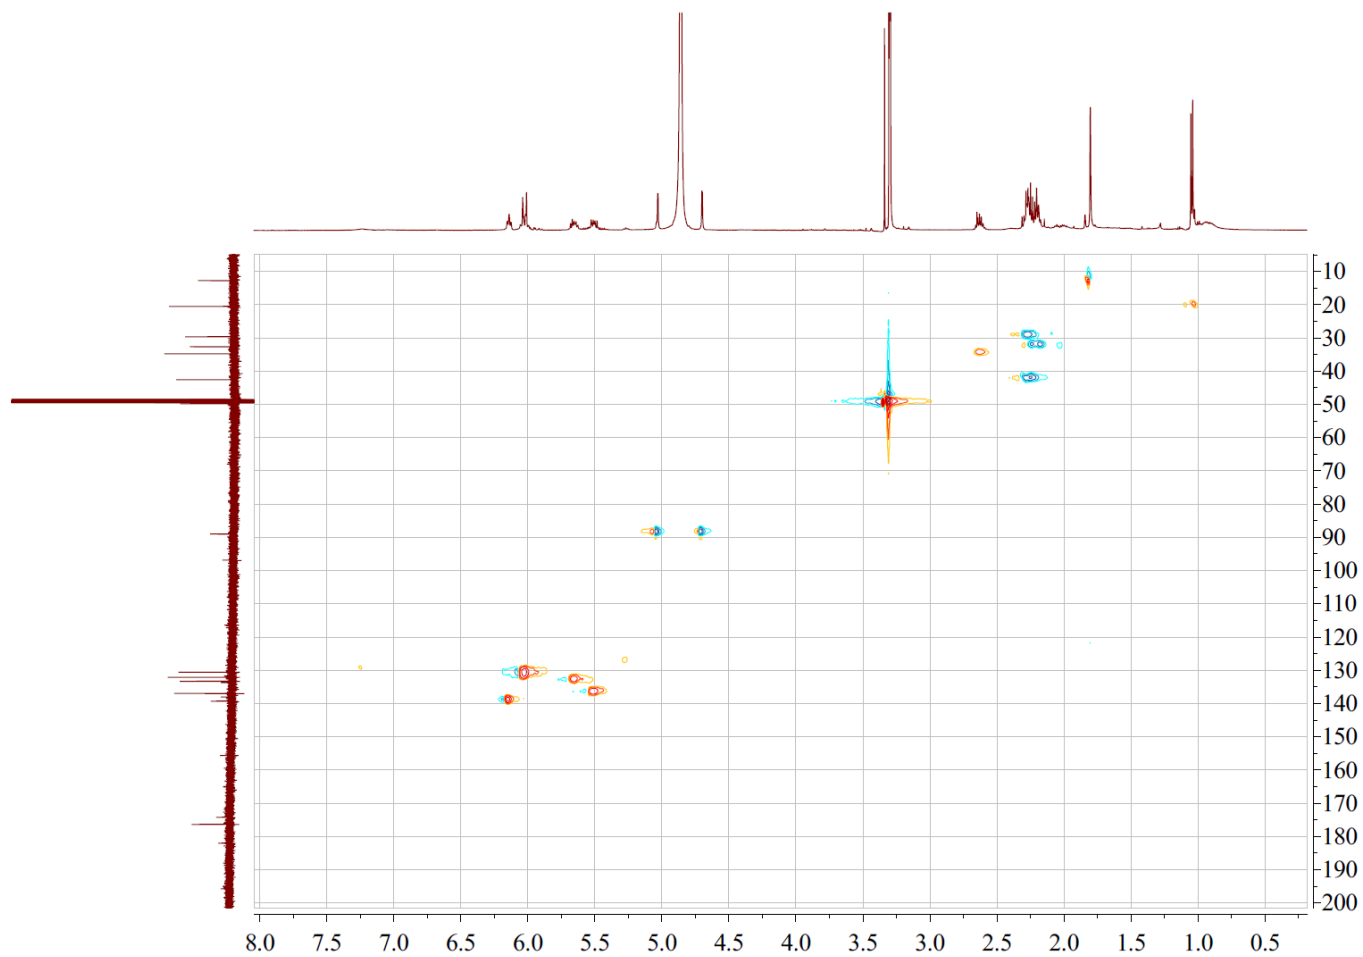

**Figure S10.** The spectroscopic data of **6**  
(E) The HMBC spectrum of **6** (500 MHz for  $^1\text{H}$  NMR in  $\text{CD}_3\text{OD}$ )

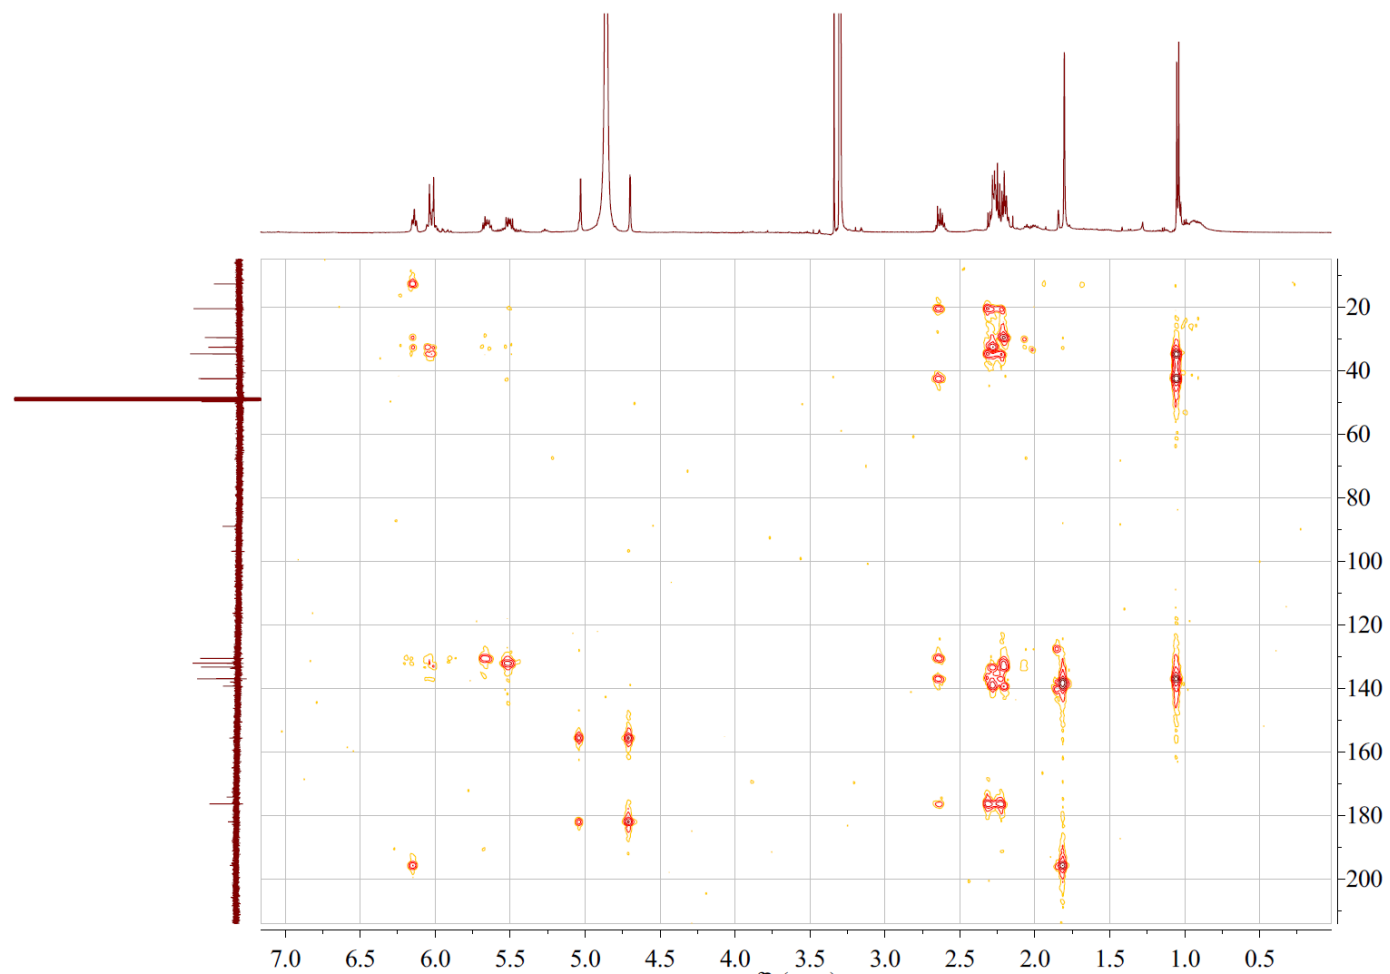

**Figure S10.** The spectroscopic data of **6**  
(F) The  $^1\text{H}$ - $^1\text{H}$  COSY spectrum of **6** (500 MHz for  $^1\text{H}$  NMR in  $\text{CD}_3\text{OD}$ )

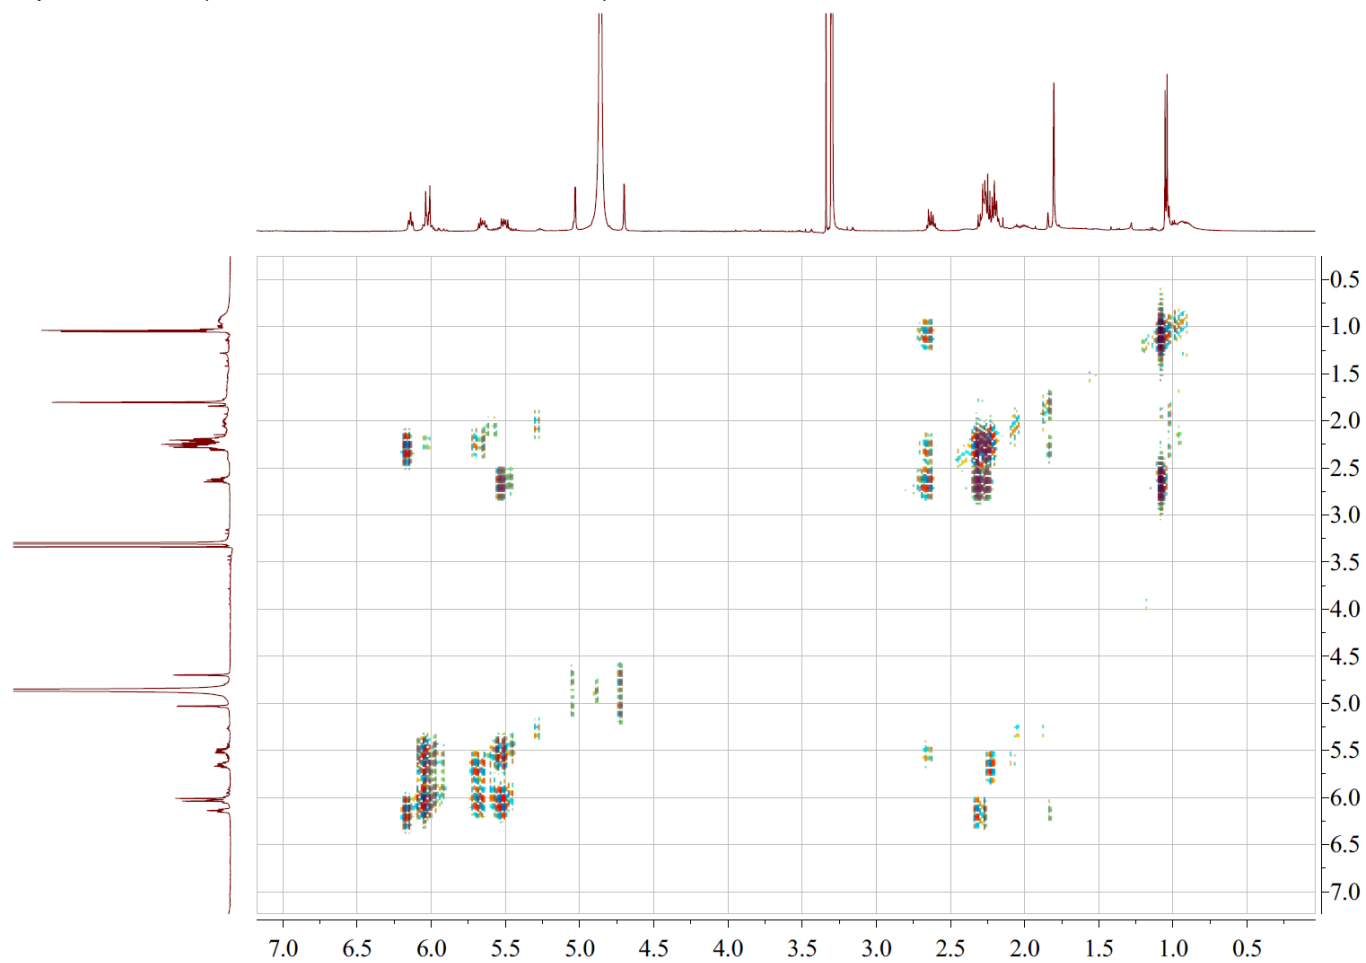



**Figure S12.** SDS-PAGE analysis of purified ThnC.

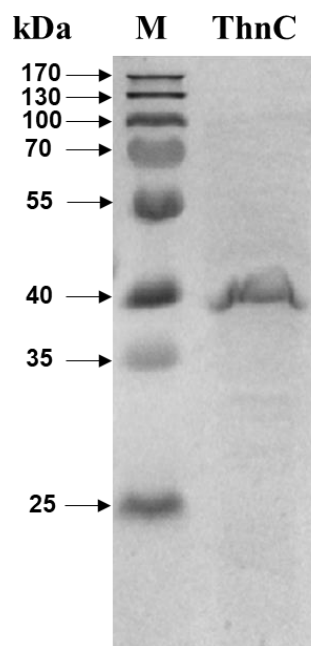

Purification of C-(His)<sub>6</sub>-tagged ThnC from *E. coli* BL21(DE3)/pZYG105. The acrylamide percentage of the SDS-PAGE gel is 12 %.

**Figure S13.** HPLC analysis of in vitro assays of ThnC with substrate 1

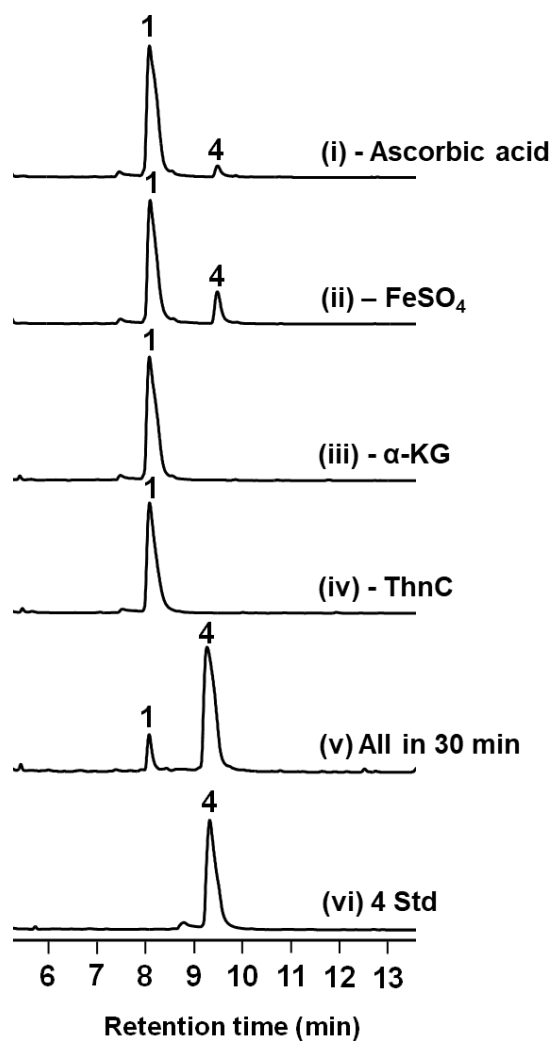

(i) minus ascorbic acid, (ii) minus FeSO<sub>4</sub>, (iii) minus α-ketoglutarate (α-KG), (iv) minus ThnC, (v) a complete ThnC assay, (vi) 4 std. The ThnC enzyme assay was performed in Tris-HCl buffer (50 mM, pH 8.0) at 28°C containing 200 μM 1, 2 μM ThnC, 5 mM L-ascorbic acid, 5 mM α-ketoglutarate, 1 mM FeSO<sub>4</sub>.



## References

1. N. Liu, Y. S. Hung, S. S. Gao, L. Hang, Y. Zou, Y. H. Chooi and Y. Tang, *Org Lett*, 2017, **19**, 3560-3563.
2. M. Chen, Q. Liu, S. S. Gao, A. E. Young, S. E. Jacobsen and Y. Tang, *Proc Natl Acad Sci U S A*, 2019, **116**, 5499-5504.
3. T. Nayak, E. Szewczyk, C. E. Oakley, A. Osmani, L. Ukil, S. L. Murray, M. J. Hynes, S. A. Osmani and B. R. Oakley, *Genetics*, 2006, **172**, 1557-1566.
